1 **A *Shigella* type 3 effector protein co-opts host inositol pyrophosphates for activity**

2

3 Thomas E. Wood,<sup>1,2,†</sup> Jessica M. Yoon,<sup>3,5,†</sup> Heather D. Eshleman,<sup>1,2,6</sup> Daniel J. Slade,<sup>4</sup> Cammie F.  
4 Lesser,<sup>1,2</sup> Marcia B. Goldberg<sup>1,2,\*</sup>

5 <sup>1</sup>Department of Medicine, Division of Infectious Diseases, Massachusetts General Hospital, Boston,  
6 Massachusetts, USA.

7 <sup>2</sup>Department of Microbiology, Blavatnik Institute, Harvard Medical School, Boston, Massachusetts,  
8 USA.

9 <sup>3</sup>Department of Molecular and Cellular Biology, Harvard University, Cambridge, Massachusetts, USA.

10 <sup>4</sup>Department of Biochemistry, Virginia Polytechnic Institute and State University, Blacksburg, Virginia,  
11 USA

12 <sup>5</sup>Present address: Office of Response and Recovery, Federal Emergency Management Agency,  
13 Washington, D.C., USA

14 <sup>6</sup>Present address: Lexical Intelligence, LLC, Rockville, Maryland, USA

15

16 <sup>†</sup>These authors contributed equally to this work.

17 <sup>\*</sup>For correspondence: E-mail: [marcia.goldberg@mgh.harvard.edu](mailto:marcia.goldberg@mgh.harvard.edu) Tel: +1 617-525-4820.

18 **Abstract**

19 *Shigella* spp. cause diarrhea by invading human intestinal epithelial cells. Effector proteins delivered  
20 into target host cells by the *Shigella* type 3 secretion system modulate host signaling pathways and  
21 processes in a manner that promotes infection. The effector OspB activates mTOR, the central cellular  
22 regulator of growth and metabolism, and potentiates the inhibition of mTOR by rapamycin. The net  
23 effect of OspB on cell monolayers is cell proliferation at infectious foci. To gain insights into the  
24 mechanism by which OspB potentiates rapamycin inhibition of mTOR, we employ *in silico* analyses to  
25 identify putative catalytic residues of OspB and show that a conserved cysteine-histidine dyad is  
26 required for this activity of OspB. In a screen of an over-expression library in *Saccharomyces*  
27 *cerevisiae*, we identify a dependency of OspB activity on inositol pyrophosphates, a class of eukaryotic  
28 secondary messengers that are distinct from the inositol phosphates known to act as cofactors for  
29 bacterial cysteine proteases. We show that inositol pyrophosphates are required for OspB activity not  
30 only in yeast, but also in mammalian cells - the first demonstration of inositol pyrophosphates being  
31 required for virulence of a bacterial pathogen *in vivo*.

## 32 **Introduction**

33 *Shigella* spp. are the etiological agents of bacillary dysentery, accounting for one of the leading causes  
34 of mortality from diarrheal disease (Khalil et al., 2018). These Gram-negative bacterial pathogens  
35 invade the intestinal epithelium, establishing a replicative niche within colonic epithelial cells and  
36 triggering an acute inflammatory immune response (Carayol & Tran Van Nhieu, 2013). The type 3  
37 secretion system (T3SS) is required for *S. flexneri* infection, facilitating invasion and bacterial  
38 multiplication through the delivery into host cells of effector proteins that subvert cellular signaling  
39 pathways. Effector proteins also promote the cell-to-cell spread of intracellular *Shigella*, whereby it  
40 disseminates throughout the intestinal epithelium (Agaisse, 2016).

41 The T3SS effector protein OspB restricts the intercellular spread of *S. flexneri* by activating mammalian  
42 target of rapamycin (mTOR), the master regulator of cellular growth (Lu et al., 2015). OspB-mediated  
43 activation of mTOR promotes survival and proliferation of infected host epithelial cells, which may  
44 supply further niches for the replicating bacteria. Other phenotypes have also been described for OspB,  
45 such as dampening the innate immune response *via* MAP kinase and NF- $\kappa$ B signaling and modulating  
46 cytokine release (Ambrosi et al., 2015; Fukazawa et al., 2008; Zurawski, Mumy, Faherty, McCormick,  
47 & Maurelli, 2009).

48 To gain insights into the mechanisms of OspB activity, we explored similarities among OspB and its  
49 homologs and conducted a genome-wide screen for host factors necessary for its activity. We identified  
50 the catalytic residues of OspB through bioinformatic analysis and assessed their requirement for OspB  
51 activity. Exploiting a *Saccharomyces cerevisiae* expression system, we determined that inositol  
52 phosphate biosynthesis is a process critical to OspB activity. Genetic analysis of this pathway  
53 demonstrated that inositol pyrophosphates, rather than inositol phosphates, are necessary for OspB  
54 function, suggesting a role for inositol pyrophosphates during bacterial infection.

## 55 **Results and Discussion**

### 56 **OspB exhibits structural homology to cysteine proteases**

57 To improve our understanding of the mechanism of action of OspB, we performed *in silico* analyses of  
58 its amino acid sequence. This analysis revealed that OspB shares 27-30% sequence identity with the  
59 cysteine protease domains (CPD) of the large clostridial cytotoxins TcdA and TcdB of *Clostridioides*  
60 *difficile* and the multifunctional autoprocessing repeats-in-toxin (MARTX) RtxA toxins of *Vibrio*  
61 *cholerae* and *V. vulnificus* (**Figure 1a**). TcdA, TcdB and RtxA are modular toxins that upon endocytosis  
62 into the host cell undergo autoproteolysis, which releases toxin domains that subvert cellular processes  
63 by inducing actin depolymerization and altering GTPase signaling (Fullner & Mekalanos, 2000; Just et  
64 al., 1995). In contrast to these large cytotoxins, OspB is small (288 amino acids; 32 kD) and in cells,  
65 we found no evidence for OspB autoprocessing (**Figure S1**).

66 The cysteine and histidine residues required for the proteolytic activity of the CPDs are conserved in  
67 OspB and the orthologous T3SS effector protein of *V. parahaemolyticus* VPA1380 (Calder et al., 2014;  
68 Egerer, Giesemann, Jank, Satchell, & Aktories, 2007; Sheahan, Cordero, & Satchell, 2007) (**Figure**  
69 **1a**). Indeed, the tertiary structure of OspB can be modelled on the CPDs of RtxA and TcdA with 96%  
70 and 62% confidence, respectively, with conservation of the positions of their catalytic residues with  
71 C184 and H144 of OspB (**Figure 1b**). Mutagenesis studies of TcdA showed that in addition to C700  
72 and H655, D589 is required for autoprocessing through proton abstraction from the histidine in the  
73 active site, whereas the analogous aspartic acid residue in RtxA is not required for its activity  
74 (Prochazkova et al., 2009; Pruitt et al., 2009). Rather, the catalytic residues of RtxA comprise solely of  
75 the C3568-H3519 dyad. In OspB an aspartic acid residue (D108) is present at the equivalent position  
76 of D589<sup>TcdA</sup> and was therefore a candidate for involvement in catalysis (**Figure 1b**).

77 The alignment of OspB with RtxA and TcdA suggested that OspB residues C184 and H144, and  
78 potentially D108, may be required for OspB activity. A quantitative assay in yeast strains expressing *S.*  
79 *flexneri* effector proteins previously demonstrated that OspB causes growth inhibition of yeast in the  
80 presence of the cellular stressor caffeine (Slagowski, Kramer, Morrison, LaBaer, & Lesser, 2008). We

81 utilized this assay to probe the role of the putative catalytic residues in OspB activity. Whereas  
82 expression of wild type OspB elicits a drastic growth defect in the presence of caffeine, mutation of  
83 either C184 or H144 completely abrogated toxicity (**Figure 1c**). On the other hand, alanine substitution  
84 of D108 did not rescue yeast growth. These results indicate that the function of OspB requires both a  
85 cysteine and a histidine residue and is independent of D108, similar to the cysteine-histidine catalytic  
86 dyad of the CPD of RtxA.

87 Among the effects of caffeine on cellular processes, in yeast, inhibition of TOR is described as an  
88 important mode of action for this compound (Reinke, Chen, Aronova, & Powers, 2006). To determine  
89 whether TOR plays a role in OspB-dependent growth inhibition of yeast, we replaced caffeine in the  
90 media with rapamycin, which unlike caffeine is a specific inhibitor of TOR. As with caffeine, the  
91 presence of rapamycin sensitized yeast to growth inhibition by OspB in a manner that depended on  
92 residues C184 and H144 (**Figure 1c**).

93 These results indicate that the activity of OspB in yeast results in hypersensitivity to TOR inhibition,  
94 either by caffeine or by rapamycin, which mirrors our previous findings that OspB potentiates  
95 rapamycin inhibition of growth in mammalian cells (Lu et al., 2015). Functional analysis of point  
96 mutations in OspB derivatives shows that this modulation of the TOR pathway depends on the predicted  
97 catalytic dyad of C184 and H144, bolstering our predictions for the tertiary structure of OspB as a  
98 structural homolog of the cysteine protease domains of several modular bacterial toxins. Furthermore,  
99 the presence of similar OspB-dependent phenotypes in both yeast and mammalian cells with respect to  
100 sensitization to TOR inhibition demonstrates that yeast present a reasonable model for investigating the  
101 mechanism of OspB activity.

## 102 **In yeast, inositol pyrophosphate biosynthesis is necessary for OspB-mediated growth inhibition**

103 With the goal of identifying factors required for OspB activity, we screened a *S. cerevisiae*  
104 over-expression library (Sopko et al., 2006) for genes that rescued OspB inhibition of yeast growth in  
105 the presence of caffeine (**Figure 2a**). The OspB-mediated growth defect was suppressed by  
106 over-expression of several genes, including two in the inositol phosphate biosynthetic pathway, *DDP1*

107 and *SIW14* (**Table S1**). Of note, the CPDs of RtxA and TcdA bind inositol hexakisphosphate (IP<sub>6</sub>)  
108 (**Figure 1b**) and require it for cysteine protease activity *in vitro* (Prochazkova & Satchell, 2008; Reineke  
109 et al., 2007). Therefore, we investigated whether OspB also recruits an inositol phosphate species as a  
110 cofactor. Introduction of a plasmid over-expressing either *DDP1* or *SIW14* into a yeast strain that  
111 constitutively produces OspB resulted in complete rescue of the OspB-mediated growth defect, whereas  
112 the empty over-expression vector control had no effect (**Figure 2b**). *DDP1* and *SIW14* each encode a  
113 phosphatase that hydrolyzes  $\beta$ -phosphates of inositol pyrophosphate species (Kilari, Weaver, Shears, &  
114 Safrany, 2013; Safrany et al., 1999; Steidle et al., 2016) (**Figure 2c**). Inositol pyrophosphate molecules  
115 may contain up to eight phosphate groups with at least one phosphoanhydride-bonded pyrophosphate  
116 moiety, as opposed to the six individually ester-bonded phosphate groups present on IP<sub>6</sub> (**Figure 2c**).  
117 These results thus indicate that in yeast cells, the presence of inositol pyrophosphates, rather than IP<sub>6</sub>  
118 itself, may be required for OspB function.

119 Ddp1p and Siw14p have preferences for the  $\beta$ -phosphate at the 1- and 5-positions, respectively, and can  
120 dephosphorylate 1,5-IP<sub>8</sub>, 1-IP<sub>7</sub> and 5-IP<sub>7</sub> to produce IP<sub>6</sub> (Kilari et al., 2013; Steidle et al., 2016; Wang,  
121 Gu, Rolfes, Jessen, & Shears, 2018) (**Figure 2c**). A further inositol pyrophosphate species, PP-IP<sub>4</sub>, can  
122 be produced from 5-kinase activity on the substrate IP<sub>5</sub> (Saiardi, Caffrey, Snyder, & Shears, 2000). To  
123 discriminate whether PP-IP<sub>4</sub> or an IP<sub>6</sub>-derived inositol pyrophosphate species is involved in OspB-  
124 mediated growth inhibition, we tested the effect on the OspB phenotype of a deletion in *IPK1*, which  
125 encodes the 2-kinase that generates IP<sub>6</sub> from IP<sub>5</sub> (York, Odom, Murphy, Ives, & Wentz, 1999). Deletion  
126 of *IPK1* suppressed OspB-mediated sensitization to caffeine (**Figure 2d**), demonstrating that the  
127 cofactor(s) required for OspB function in yeast cells is specifically one or more inositol pyrophosphate  
128 species synthesized from the precursor IP<sub>6</sub>.

### 129 **In mammalian cells, OspB activity depends on inositol pyrophosphates**

130 The inositol phosphate biosynthetic pathway is conserved throughout eukaryotes. However, in  
131 mammalian cells, several isoforms exist of the enzymes that carry out each step of the biosynthetic  
132 pathway. IP<sub>6</sub> and 1-IP<sub>7</sub> are phosphorylated at the 5-position by Kcs1p in yeast, whereas in mammalian  
133 cells this activity is conducted by isoforms 1, 2 and 3 of inositol hexakisphosphate kinase (IP6K1/2/3)

134 (Saiardi, Erdjument-Bromage, Snowman, Tempst, & Snyder, 1999; Shears, 2018) (**Figures 2d** and **3a**).  
135 Phosphorylation of the 1-position phosphate group of IP<sub>6</sub> and 5-IP<sub>7</sub> is catalyzed by the yeast enzyme  
136 Vip1p, of which the mammalian homologs are isoforms 1 and 2 of diphosphoinositol-  
137 pentakisphosphate kinase (PPIP5K1/2) (Choi, Williams, Cho, Falck, & Shears, 2007; Fridy, Otto,  
138 Dollins, & York, 2007; Mulugu et al., 2007). Biochemical analyses of inositol phosphate levels in  
139 mammalian cells reveal that aside from the major species IP<sub>6</sub>, 5-IP<sub>7</sub> and 1,5-IP<sub>8</sub> are relatively abundant,  
140 whereas 1-IP<sub>7</sub> constitutes just 2% of cellular IP<sub>7</sub> (Gu, Wilson, Jessen, Saiardi, & Shears, 2016). Thus,  
141 the primary pathway of inositol pyrophosphate synthesis from IP<sub>6</sub> is thought to proceed *via* 5-IP<sub>7</sub> and  
142 to be catalyzed by IP6K enzymes.

143 To determine whether inositol pyrophosphates are required for OspB activity in mammalian cells, we  
144 examined OspB during infection with *S. flexneri*. When *Shigella* infects cell monolayers, it spreads  
145 from cell to cell using actin-based motility, with eventual death of the infected cells (Bernardini,  
146 Mounier, D'Hauteville, Coquis-Rondon, & Sansonetti, 1989; Carneiro et al., 2009). Over the course of  
147 48-72 h of infection, bacterial spread creates central areas of cellular debris, known as plaques. By  
148 simultaneously activating mTOR-induced cell proliferation of viable cells at the periphery of the  
149 plaques, OspB restricts the total area of plaques formed by *S. flexneri* in cell monolayers (Lu et al.,  
150 2015). Consequently, an  $\Delta ospB$  mutant produces larger plaques than the wild type strain. To test the  
151 role of inositol pyrophosphates in OspB activity in mammalian cells, we assessed the impact of the  
152 presence or absence of OspB on the area of spread of *S. flexneri* strains with severely reduced inositol  
153 pyrophosphate levels.

154 Most cellular 5-IP<sub>7</sub> is synthesized by isoform 1 of IP6K (IP6K1), such that in cells with a deletion in  
155 *IP6K1*, levels of inositol pyrophosphates are markedly reduced (Bhandari, Juluri, Resnick, & Snyder,  
156 2008). A previously described (Lu et al., 2015), in *IP6K<sup>+/+</sup>* cells, wild type *S. flexneri* produced plaques  
157 that were significantly smaller than those of the  $\Delta ospB$  mutant (**Figures 3b** and **c**). In contrast, in the  
158 absence of *IP6K1*, wild type *S. flexneri* produced plaques that were significantly larger than those it  
159 produced in *IP6K<sup>+/+</sup>* cells. Moreover, in *IP6K1<sup>-/-</sup>* cells, the plaques produced by the wild type strain  
160 were similar in size to those produced by the  $\Delta ospB$  mutant. These findings demonstrate that inositol

161 pyrophosphates are necessary for the ability of OspB to restrict plaque size, indicating that, as in yeast  
162 cells, OspB depends on one or more of these eukaryotic signaling molecules for full activity in  
163 mammalian cells.

164 Whereas IP<sub>7</sub> and IP<sub>8</sub> species have been shown to be important secondary messengers, influencing the  
165 cell cycle, cellular energy levels and vesicle trafficking (Chanduri et al., 2016; Lee, Mulugu, York, &  
166 O'Shea, 2007; Szigyarto, Garedew, Azevedo, & Saiardi, 2011), to the best of our knowledge, this is  
167 the first demonstration of these molecules being required for bacterial virulence. A described virulence-  
168 associated role for inositol pyrophosphates is in innate immune responses to viral pathogens, whereby  
169 production of 1-IP<sub>7</sub> by *PPIP5K2* promotes the type I interferon response (Pulloor et al., 2014). By  
170 contrast, here we show that the *S. flexneri* T3SS effector protein co-opts inositol pyrophosphates to  
171 facilitate infection, utilizing the host signaling molecule to the advantage of the bacterium.

172 Given the sequence similarity and predicted structural homology of OspB to the CPDs of TcdA, TcbB  
173 and RtxA (**Figure 1**), and the structural and biochemical evidence that IP<sub>6</sub> serves as a cofactor for the  
174 cysteine protease domains of these toxins, the mechanism by which inositol pyrophosphates are  
175 required for OspB activity is presumably analogous to the role of IP<sub>6</sub> in TcdA, TcbB and RtxA, namely  
176 as a cofactor. The negatively-charged inositol phosphate cofactor binds to a pocket in these CPDs that  
177 consists of several positively-charged residues (predominantly lysines and arginines) and cofactor  
178 binding induces a conformational change in the active site, which in turn activates proteolysis  
179 (Lupardus, Shen, Bogyo, & Garcia, 2008; Prochazkova et al., 2009; Prochazkova & Satchell, 2008;  
180 Pruitt et al., 2009; Shen et al., 2011). OspB is also rich in positively-charged residues; the 288-residue  
181 protein contains 31 lysines and 8 arginines. However, the sequence of OspB that aligns with RtxA and  
182 TcdA does not encompass the RtxA or TcdA IP<sub>6</sub>-binding pocket, making it challenging to predict the  
183 inositol pyrophosphate binding pocket in OspB.

184 Several bacterial virulence factors, such as the T3SS effectors YopJ of *Yersinia* spp., IcsB of *S. flexneri*,  
185 and the aforementioned MARTX and clostridial toxins, are activated by IP<sub>6</sub> *in vitro* (Liu et al., 2018;  
186 Mittal, Peak-Chew, Sade, Vallis, & McMahan, 2010; Prochazkova & Satchell, 2008; Reineke et al.,  
187 2007). However, which inositol phosphate species activates these bacterial proteins *in situ* in the host



188 cell cytosol has not been explicitly determined. One report into the activation of TcdB found that *in*  
189 *vitro*, IP<sub>7</sub> induces autoproteolysis more efficiently than IP<sub>6</sub> (Savidge et al., 2011), raising the possibility  
190 that *in vivo*, an inositol pyrophosphate may be the preferred cofactor.

191 We show that the suppression of OspB-mediated yeast growth inhibition in the absence of *ipk1* indicates  
192 that IP<sub>6</sub>, IP<sub>7</sub> and/or IP<sub>8</sub> are needed for OspB activity in yeast. Furthermore, through over-expression of  
193 *DDP1* or *SIW14*, which reduces cellular levels of inositol pyrophosphates, we demonstrated that IP<sub>6</sub> is  
194 unlikely to be the relevant inositol phosphate species activating OspB (**Figure 2**). VPA1380, the *V.*  
195 *parahaemolyticus* ortholog of OspB, requires *IPK1* for its activity, and mutagenesis of predicted IP<sub>6</sub>-  
196 binding residues abrogated its function (Calder et al., 2014). Since in addition to being unable to produce  
197 IP<sub>6</sub>, an *ipk1Δ* mutant is unable to produce IP<sub>7</sub> or IP<sub>8</sub>, it is plausible that inositol pyrophosphates are the  
198 preferred cofactors for activating all members of the OspB family of effector proteins.

199 With current data, we cannot discriminate which single species or whether multiple species among 1-  
200 IP<sub>7</sub>, 5-IP<sub>7</sub> and/or 1,5-IP<sub>8</sub> is/are functioning as a cofactor of OspB. We also cannot eliminate the  
201 possibilities that the biosynthetic enzymes themselves are playing a role or that modulation of inositol  
202 pyrophosphates levels has an indirect effect on OspB activity; however, we believe that the  
203 preponderance of evidence weighs in favor of a physical association between OspB and inositol  
204 pyrophosphates. It is apparent that cofactor promiscuity exists *in vitro* and that the relative  
205 concentrations of inositol phosphates species and sub-cellular localization and sequestration in cells  
206 will be important determinants in cofactor preference. In conclusion, we present the first demonstration  
207 of the exploitation of the host inositol pyrophosphates by a bacterial virulence factor *in vivo*, furthering  
208 our understanding of the utilization of host cofactors by pathogens during infection.

## 209 **Experimental Procedures**

### 210 **Growth conditions and cell culture**

211 *S. flexneri* serotype 2a wild type strain 2457T and its isogenic *ospB* mutant have been described (Labrec,  
212 Schneider, Magnani, & Formal, 1964; Lu et al., 2015). Bacteria were isolated from single red colonies  
213 on agar containing Congo red and were grown in tryptic soy broth at 37 °C with agitation. *E. coli*  
214 DH10B (Grant, Jessee, Bloom, & Hanahan, 1990) was used as the routine cloning host and was grown  
215 in Luria broth at 37 °C. *S. cerevisiae* S288C was used as the heterologous expression host to probe the  
216 roles of host proteins in the function of OspB and was routinely cultured at 30 °C in yeast extract-  
217 peptone-dextrose (YPD) broth or in synthetic selective media (MP Biomedicals) lacking histidine,  
218 uracil and/or leucine for auxotrophic selection. 1.5 % (w/v) agar was added for solid media  
219 formulations, and where appropriate, media was supplemented with 50 µg/ml ampicillin, 2% (w/v) D-  
220 glucose, 2% (w/v) D-galactose, 6 mM caffeine or 5 nM rapamycin.

221 *IP6KI<sup>+/+</sup>* and *IP6KI<sup>-/-</sup>* mouse embryonic fibroblast cell lines (provided by Dr Anutosh Chakraborty, St  
222 Louis University, St Louis, MO) were maintained in Dulbecco's modified Eagle medium (DMEM)  
223 (Gibco) supplemented with 10% (v/v) fetal bovine serum (FBS) at 37 °C with 5% CO<sub>2</sub>. Inhibition of  
224 mTOR was achieved through the addition of 10 nM rapamycin to mammalian cell culture media.

### 225 **Bioinformatic analyses**

226 *In silico* modelling of the tertiary structure of OspB was conducted on the Phyre2 server (Kelley,  
227 Mezulis, Yates, Wass, & Sternberg, 2015), whereas alignment with the crystal structures of RtxA<sup>VC</sup>  
228 (Lupardus et al., 2008) and TcdA (Pruitt et al., 2009) was achieved using the CEAlign algorithm within  
229 PyMol (Schrödinger, LLC). Protein sequences were retrieved from the non-redundant NCBI database  
230 and aligned using MUSCLE (Edgar, 2004) before manual curation to select the regions of interest.

### 231 **Genetic manipulations**

232 For expression of *ospB* in *S. cerevisiae*, the *ospB* gene from *S. flexneri* 2457T was cloned into the  
233 Gateway destination vector pAG413GPD-EGFP-*ccdB* (provided by Dr Susan Lindquist) to replace

234 the *EGFP* gene. Generation of *OspB* point mutants was achieved by splicing by overlap extension  
235 PCR using the following combinations of primers:  
236 CCGTTTTACTTCAAGCGGCTCCGCTGATAAAGTGG and  
237 CCACTTTATCAGCGGAGCCGCTTGAAGTAAAACGG for C184S;  
238 5'-GGTTTATATTCTTGGGGCCGGTAGTCCTGGTTCTCATC and  
239 5'-GATGAGAACCAGGACTACCGGCCCAAGAATATAAACC for H144A;  
240 5'-TAGTAATAAATAATGCTGATGACGCAT and  
241 5'-ATGCGTCATCAGCATTATTTACTA for D108A. Allelic exchange was used to construct  
242 the *ipk1* $\Delta$  mutant in *S. cerevisiae* BY4741, replacing the gene with a *LEU2* cassette. The *LEU2* gene  
243 was amplified by PCR from the pRS315 vector using primers  
244 5'-ACCAGTCGAAAATTGTCAGAGATAAGTTCCTTTTTTGAAAAGAAAGATCGTAACTGTG  
245 GGAATACTCAGG and  
246 5'-TAATGTATGTGCATCTGCCAGTACCAAAGGTGGAAAGAAAAGTATACAGTTTTAAGCA  
247 AGGATTTTC. The resulting product was transformed into BY4741, and to select for homologous  
248 recombination, the yeast were grown on selective media. Successful integration into the *ipk1* locus  
249 was assessed by colony PCR using primers 5'-CACGTAGGAAAGCGA and  
250 5'-CCCTTCGTTGAATATCG and by demonstration of loss of leucine auxotrophy. Yeast were  
251 transformed using the lithium acetate method.

## 252 **Yeast growth assays and screen for suppressors of growth inhibition**

253 Individual yeast transformants that constitutively express *ospB* or derivatives containing point  
254 mutations were grown in synthetic selective liquid media containing 2% D-glucose. To investigate the  
255 impact of *OspB* constructs on growth, yeast cells were washed and serially diluted four-fold in  
256 phosphate-buffered saline before 5  $\mu$ l of each dilution were spotted on synthetic selective solid media.  
257 Media contained 2% D-glucose either without further additives or supplemented with 6 mM caffeine  
258 or 5 nM rapamycin. The role of the yeast *IPK1* gene was assessed similarly.

259 To screen for suppressors of *OspB*-mediated toxicity in *S. cerevisiae* by yeast gene over-expression, the  
260 strain BY4742 pAG413GPD-*ospB* was mated with the haploid GST-fusion yeast over-expression

261 library (YSC4423, Dharmacon) on YPD. The resulting diploids were selected by plating on non-  
262 inducing synthetic selective media containing 2% D-glucose. The screen was conducted by spotting in  
263 quadruplicate on inducing synthetic selective solid media containing 2% D-galactose and 6 mM  
264 caffeine. All steps in the screen were conducted in an automated manner as described previously  
265 (Slagowski et al., 2008). Suppressors were classified as strains which displayed qualitatively moderate  
266 to robust growth of all four spots on the caffeine plate four days after pinning. Direct analysis of  
267 suppressor genes *DDP1* and *SIW14* was achieved through plasmid isolation and transformation into  
268 BY4741 pAG413GPD-*ospB* and assayed as above by serial dilution onto media containing D-galactose.

### 269 **Transfection**

270 Transfection plasmids were constructed by cloning the *ospB* gene into the pCMV-*myc* vector at EcoRI  
271 and XhoI sites. A construct encoding OspB or its C184S derivative was also amplified with a C-terminal  
272 triple FLAG and hexahistidine tag and cloned into pcDNA3 at BamHI and XhoI sites. Cells were  
273 transfected with plasmids using FuGENE 6 (Promega) according to the manufacturer's instructions,  
274 and experimental samples were analyzed 24 h after transfection.

### 275 **SDS-PAGE and immunoblotting**

276 For immunoblot analysis, protein samples were separated by SDS-PAGE, transferred to nitrocellulose  
277 membranes and detected by western blot analysis using standard procedures. The antibodies used were  
278 peroxidase-conjugated anti- $\beta$ -actin (A3854, Sigma; diluted to 1:10 000), anti- $\alpha$ -tubulin (sc-53030,  
279 Santa Cruz; diluted to 1:1000), anti-FLAG (F3165, Sigma; diluted to 1:1000), anti-*myc* (631206,  
280 Clontech; diluted to 1:1000) and anti-OspB (diluted to 1:10 000). The rabbit anti-OspB antibody was  
281 generated (Covance Inc.) against a 14-mer peptide of OspB located 18 residues from the C-terminus.

### 282 **Plaque assays**

283 Mouse embryonic fibroblasts were seeded in 6-well plates and infected with exponential phase *S.*  
284 *flexneri* strains at a multiplicity of infection of 0.004. Bacteria were centrifuged onto the cells at 830 *g*  
285 for 10 min before incubation for 50 min at 37 °C in 5% CO<sub>2</sub>. The media was replaced with a 0.5% (w/v)  
286 agarose overlay in DMEM containing FBS and 25  $\mu$ g/ml gentamicin to kill extracellular bacteria. After

287 setting at room temperature for 10 min, the infection was allowed to continue at 37 °C for 48 h, before  
288 adding a 0.7% (w/v) agarose overlay in DMEM containing FBS, gentamicin and 0.002% (w/v) neutral  
289 red dye. Infected monolayers were imaged using a scanner after a further 150 min incubation. Semi-  
290 automated measurement of plaque area was conducted using FIJI (Schindelin et al., 2012) using a script  
291 developed in-house. Statistically significant differences in plaque size was determined with the tests  
292 described in the figure legend using Prism 8.0 (GraphPad).

293 **Acknowledgements**

294 We thank Austin C. Hachey and Yang Fu for technical assistance. We are grateful to Dr. Anutosh  
295 Chakraborty (St Louis University, St Louis, MO) and Prof. Solomon H. Snyder (Johns Hopkins Medical  
296 School, Baltimore, MD) for the gift of *IP6K1*<sup>-/-</sup> mouse embryonic fibroblasts. We thank Stephen B.  
297 Shears, Henning Jessen, and D. Borden Lacy for helpful discussions. This research was supported by  
298 Department of Defense grant TS160046 (to M.B.G.), funding from the Massachusetts General Hospital  
299 Executive Committee on Research (to M.B.G.), NIH grants T32 AI007061 and F32 AI131582 (to  
300 H.D.E.) and R01 AI064285 (to C.F.L.). The authors have no conflicts of interest.

301 **References**

- 302 Agaisse, H. (2016). Molecular and Cellular Mechanisms of *Shigella flexneri* Dissemination. *Frontiers*  
303 *in Cellular and Infection Microbiology*, 6(March), 29. <http://doi.org/10.3389/fcimb.2016.00029>
- 304 Ambrosi, C., Pompili, M., Scribano, D., Limongi, D., Petrucca, A., Cannavacciuolo, S., ... Nicoletti,  
305 M. (2015). The *Shigella flexneri* OspB effector: an early immunomodulator. *International*  
306 *Journal of Medical Microbiology*, 305(1), 75–84. <http://doi.org/10.1016/j.ijmm.2014.11.004>
- 307 Bernardini, M. L., Mounier, J., D’Hauteville, H., Coquis-Rondon, M., & Sansonetti, P. J. (1989).  
308 Identification of *icsA*, a plasmid locus of *Shigella flexneri* that governs bacterial intra- and  
309 intercellular spread through interaction with F-actin. *Proceedings of the National Academy of*  
310 *Sciences of the United States of America*, 86(10), 3867–71.  
311 <http://doi.org/10.1073/pnas.86.10.3867>
- 312 Bhandari, R., Juluri, K. R., Resnick, A. C., & Snyder, S. H. (2008). Gene deletion of inositol  
313 hexakisphosphate kinase 1 reveals inositol pyrophosphate regulation of insulin secretion,  
314 growth, and spermiogenesis. *Proceedings of the National Academy of Sciences of the United*  
315 *States of America*, 105(7), 2349–53. <http://doi.org/10.1073/pnas.0712227105>
- 316 Calder, T., Kinch, L. N., Fernandez, J., Salomon, D., Grishin, N. V., & Orth, K. (2014). *Vibrio* type  
317 III effector VPA1380 is related to the cysteine protease domain of large bacterial toxins. *PLoS*  
318 *ONE*, 9(8), e104387. <http://doi.org/10.1371/journal.pone.0104387>
- 319 Carayol, N., & Tran Van Nhieu, G. (2013). The inside story of *Shigella* invasion of intestinal  
320 epithelial cells. *Cold Spring Harbor Perspectives in Medicine*, 3(10), a016717.  
321 <http://doi.org/10.1101/cshperspect.a016717>
- 322 Carneiro, L. A. M., Travassos, L. H., Soares, F., Tattoli, I., Magalhaes, J. G., Bozza, M. T., ...  
323 Girardin, S. E. (2009). *Shigella* induces mitochondrial dysfunction and cell death in nonmyeloid  
324 cells. *Cell Host and Microbe*, 5(2), 123–36. <http://doi.org/10.1016/j.chom.2008.12.011>
- 325 Chanduri, M., Rai, A., Malla, A. B., Wu, M., Fiedler, D., Mallik, R., & Bhandari, R. (2016). Inositol

- 326 hexakisphosphate kinase 1 (IP6K1) activity is required for cytoplasmic dynein-driven transport.  
327 *The Biochemical Journal*, 473(19), 3031–47. <http://doi.org/10.1042/BCJ20160610>
- 328 Cherry, J. M., Hong, E. L., Amundsen, C., Balakrishnan, R., Binkley, G., Chan, E. T., ... Wong, E. D.  
329 (2012). *Saccharomyces* Genome Database: the genomics resource of budding yeast. *Nucleic*  
330 *Acids Research*, 40(Database issue), D700-5. <http://doi.org/10.1093/nar/gkr1029>
- 331 Choi, J. H., Williams, J., Cho, J., Falck, J. R., & Shears, S. B. (2007). Purification, sequencing, and  
332 molecular identification of a mammalian PP-InsP<sub>5</sub> kinase that is activated when cells are  
333 exposed to hyperosmotic stress. *The Journal of Biological Chemistry*, 282(42), 30763–75.  
334 <http://doi.org/10.1074/jbc.M704655200>
- 335 Edgar, R. C. (2004). MUSCLE: multiple sequence alignment with high accuracy and high throughput.  
336 *Nucleic Acids Research*, 32(5), 1792–7. <http://doi.org/10.1093/nar/gkh340>
- 337 Egerer, M., Giesemann, T., Jank, T., Satchell, K. J. F., & Aktories, K. (2007). Auto-catalytic cleavage  
338 of *Clostridium difficile* toxins A and B depends on cysteine protease activity. *The Journal of*  
339 *Biological Chemistry*, 282(35), 25314–21. <http://doi.org/10.1074/jbc.M703062200>
- 340 Fridy, P. C., Otto, J. C., Dollins, D. E., & York, J. D. (2007). Cloning and characterization of two  
341 human VIP1-like inositol hexakisphosphate and diphosphoinositol pentakisphosphate kinases.  
342 *The Journal of Biological Chemistry*, 282(42), 30754–62.  
343 <http://doi.org/10.1074/jbc.M704656200>
- 344 Fukazawa, A., Alonso, C., Kurachi, K., Gupta, S., Lesser, C. F., McCormick, B. A., & Reinecker, H.-  
345 C. (2008). GEF-H1 mediated control of NOD1 dependent NF-κB activation by *Shigella*  
346 effectors. *PLoS Pathogens*, 4(11), e1000228. <http://doi.org/10.1371/journal.ppat.1000228>
- 347 Fullner, K. J., & Mekalanos, J. J. (2000). *In vivo* covalent cross-linking of cellular actin by the *Vibrio*  
348 *cholerae* RTX toxin. *The EMBO Journal*, 19(20), 5315–23.  
349 <http://doi.org/10.1093/emboj/19.20.5315>
- 350 Grant, S. G. N., Jessee, J., Bloom, F. R., & Hanahan, D. (1990). Differential plasmid rescue from



- 351 transgenic mouse DNAs into *Escherichia coli* methylation-restriction mutants. *Proceedings of*  
352 *the National Academy of Sciences of the United States of America*, 87(12), 4645–9. Retrieved  
353 from <http://www.ncbi.nlm.nih.gov/pubmed/2162051>
- 354 Gu, C., Wilson, M. S. C., Jessen, H. J., Saiardi, A., & Shears, S. B. (2016). Inositol Pyrophosphate  
355 Profiling of Two HCT116 Cell Lines Uncovers Variation in InsP<sub>8</sub> Levels. *PloS ONE*, 11(10),  
356 e0165286. <http://doi.org/10.1371/journal.pone.0165286>
- 357 Just, I., Selzer, J., Wilm, M., von Eichel-Streiber, C., Mann, M., & Aktories, K. (1995). Glucosylation  
358 of Rho proteins by *Clostridium difficile* toxin B. *Nature*, 375(6531), 500–3.  
359 <http://doi.org/10.1038/375500a0>
- 360 Kelley, L. A., Mezulis, S., Yates, C. M., Wass, M. N., & Sternberg, M. J. E. (2015). The Phyre2 web  
361 portal for protein modeling, prediction and analysis. *Nature Protocols*, 10(6), 845–858.  
362 <http://doi.org/10.1038/nprot.2015-053>
- 363 Khalil, I. A., Troeger, C., Blacker, B. F., Rao, P. C., Brown, A., Atherly, D. E., ... Reiner, R. C.  
364 (2018). Morbidity and mortality due to *Shigella* and enterotoxigenic *Escherichia coli* diarrhoea:  
365 the Global Burden of Disease Study 1990-2016. *The Lancet Infectious Diseases*, 18(11), 1229–  
366 1240. [http://doi.org/10.1016/S1473-3099\(18\)30475-4](http://doi.org/10.1016/S1473-3099(18)30475-4)
- 367 Kilari, R. S., Weaver, J. D., Shears, S. B., & Safrany, S. T. (2013). Understanding inositol  
368 pyrophosphate metabolism and function: kinetic characterization of the DIPPs. *FEBS Letters*,  
369 587(21), 3464–70. <http://doi.org/10.1016/j.febslet.2013.08.035>
- 370 Labrec, E. H., Schneider, H., Magnani, T. J., & Formal, S. B. (1964). Epithelial cell penetration as an  
371 essential step in the pathogenesis of bacillary dysentery. *Journal of Bacteriology*, 88(5), 1503–  
372 18. Retrieved from <http://www.ncbi.nlm.nih.gov/pubmed/16562000>
- 373 Lee, Y.-S., Mulugu, S., York, J. D., & O’Shea, E. K. (2007). Regulation of a cyclin-CDK-CDK  
374 inhibitor complex by inositol pyrophosphates. *Science*, 316(5821), 109–12.  
375 <http://doi.org/10.1126/science.1139080>

- 376 Liu, W., Zhou, Y., Peng, T., Zhou, P., Ding, X., Li, Z., ... Shao, F. (2018). *N<sup>e</sup>*-fatty acylation of  
377 multiple membrane-associated proteins by *Shigella* IcsB effector to modulate host function.  
378 *Nature Microbiology*, 3(9), 996–1009. <http://doi.org/10.1038/s41564-018-0215-6>
- 379 Lu, R., Herrera, B. B., Eshleman, H. D., Fu, Y., Bloom, A., Li, Z., ... Goldberg, M. B. (2015).  
380 *Shigella* Effector OspB Activates mTORC1 in a Manner That Depends on IQGAP1 and  
381 Promotes Cell Proliferation. *PLoS Pathogens*, 11(10), e1005200.  
382 <http://doi.org/10.1371/journal.ppat.1005200>
- 383 Lupardus, P. J., Shen, A., Bogyo, M., & Garcia, K. C. (2008). Small molecule-induced allosteric  
384 activation of the *Vibrio cholerae* RTX cysteine protease domain. *Science*, 322(5899), 265–8.  
385 <http://doi.org/10.1126/science.1162403>
- 386 Mittal, R., Peak-Chew, S. Y., Sade, R. S., Vallis, Y., & McMahon, H. T. (2010). The acetyltransferase  
387 activity of the bacterial toxin YopJ of *Yersinia* is activated by eukaryotic host cell inositol  
388 hexakisphosphate. *The Journal of Biological Chemistry*, 285(26), 19927–34.  
389 <http://doi.org/10.1074/jbc.M110.126581>
- 390 Mulugu, S., Bai, W., Fridy, P. C., Bastidas, R. J., Otto, J. C., Dollins, D. E., ... York, J. D. (2007). A  
391 conserved family of enzymes that phosphorylate inositol hexakisphosphate. *Science*, 316(5821),  
392 106–9. <http://doi.org/10.1126/science.1139099>
- 393 Prochazkova, K., & Satchell, K. J. F. (2008). Structure-function analysis of inositol  
394 hexakisphosphate-induced autoprocessing of the *Vibrio cholerae* multifunctional autoprocessing  
395 RTX toxin. *The Journal of Biological Chemistry*, 283(35), 23656–64.  
396 <http://doi.org/10.1074/jbc.M803334200>
- 397 Prochazkova, K., Shuvalova, L. A., Minasov, G., Voburka, Z., Anderson, W. F., & Satchell, K. J. F.  
398 (2009). Structural and molecular mechanism for autoprocessing of MARTX toxin of *Vibrio*  
399 *cholerae* at multiple sites. *The Journal of Biological Chemistry*, 284(39), 26557–68.  
400 <http://doi.org/10.1074/jbc.M109.025510>

- 401 Pruitt, R. N., Chagot, B., Cover, M., Chazin, W. J., Spiller, B., & Lacy, D. B. (2009). Structure-  
402 function analysis of inositol hexakisphosphate-induced autoprocessing in *Clostridium difficile*  
403 toxin A. *The Journal of Biological Chemistry*, 284(33), 21934–40.  
404 <http://doi.org/10.1074/jbc.M109.018929>
- 405 Pulloor, N. K., Nair, S., McCaffrey, K., Kostic, A. D., Bist, P., Weaver, J. D., ... Krishnan, M. N.  
406 (2014). Human genome-wide RNAi screen identifies an essential role for inositol  
407 pyrophosphates in Type-I interferon response. *PLoS Pathogens*, 10(2), e1003981.  
408 <http://doi.org/10.1371/journal.ppat.1003981>
- 409 Reineke, J., Tenzer, S., Rupnik, M., Koschinski, A., Hasselmayer, O., Schratzenholz, A., ... von  
410 Eichel-Streiber, C. (2007). Autocatalytic cleavage of *Clostridium difficile* toxin B. *Nature*,  
411 446(7134), 415–9. <http://doi.org/10.1038/nature05622>
- 412 Reinke, A., Chen, J. C.-Y., Aronova, S., & Powers, T. (2006). Caffeine targets TOR complex I and  
413 provides evidence for a regulatory link between the FRB and kinase domains of Tor1p. *The*  
414 *Journal of Biological Chemistry*, 281(42), 31616–26. <http://doi.org/10.1074/jbc.M603107200>
- 415 Safrany, S. T., Ingram, S. W., Cartwright, J. L., Falck, J. R., McLennan, A. G., Barnes, L. D., &  
416 Shears, S. B. (1999). The diadenosine hexaphosphate hydrolases from *Schizosaccharomyces*  
417 *pombe* and *Saccharomyces cerevisiae* are homologues of the human diphosphoinositol  
418 polyphosphate phosphohydrolase. *The Journal of Biological Chemistry*, 274(31), 21735–40.  
419 <http://doi.org/10.1074/jbc.274.31.21735>
- 420 Saiardi, A., Caffrey, J. J., Snyder, S. H., & Shears, S. B. (2000). The inositol hexakisphosphate kinase  
421 family. Catalytic flexibility and function in yeast vacuole biogenesis. *The Journal of Biological*  
422 *Chemistry*, 275(32), 24686–92. <http://doi.org/10.1074/jbc.M002750200>
- 423 Saiardi, A., Erdjument-Bromage, H., Snowman, A. M., Tempst, P., & Snyder, S. H. (1999). Synthesis  
424 of diphosphoinositol pentakisphosphate by a newly identified family of higher inositol  
425 polyphosphate kinases. *Current Biology*, 9(22), 1323–6. <http://doi.org/10.1016/s0960->  
426 [9822\(00\)80055-x](http://doi.org/10.1016/s0960-9822(00)80055-x)

- 427 Savidge, T. C., Urvil, P., Oezguen, N., Ali, K., Choudhury, A., Acharya, V., ... Pothoulakis, C.  
428 (2011). Host S-nitrosylation inhibits clostridial small molecule-activated glucosylating toxins.  
429 *Nature Medicine*, 17(9), 1136–41. <http://doi.org/10.1038/nm.2405>
- 430 Schindelin, J., Arganda-Carreras, I., Frise, E., Kaynig, V., Longair, M., Pietzsch, T., ... Cardona, A.  
431 (2012). Fiji: an open-source platform for biological-image analysis. *Nature Methods*, 9(7), 676–  
432 82. <http://doi.org/10.1038/nmeth.2019>
- 433 Sheahan, K., Cordero, C. L., & Satchell, K. J. F. (2007). Autoprocessing of the *Vibrio cholerae* RTX  
434 toxin by the cysteine protease domain. *The EMBO Journal*, 26(10), 2552–61.  
435 <http://doi.org/10.1038/sj.emboj.7601700>
- 436 Shears, S. B. (2018). Intimate connections: Inositol pyrophosphates at the interface of metabolic  
437 regulation and cell signaling. *Journal of Cellular Physiology*, 233(3), 1897–1912.  
438 <http://doi.org/10.1002/jcp.26017>
- 439 Shen, A., Lupardus, P. J., Gersch, M. M., Puri, A. W., Albrow, V. E., Garcia, K. C., & Bogyo, M.  
440 (2011). Defining an allosteric circuit in the cysteine protease domain of *Clostridium difficile*  
441 toxins. *Nature Structural & Molecular Biology*, 18(3), 364–71.  
442 <http://doi.org/10.1038/nsmb.1990>
- 443 Slagowski, N. L., Kramer, R. W., Morrison, M. F., LaBaer, J., & Lesser, C. F. (2008). A functional  
444 genomic yeast screen to identify pathogenic bacterial proteins. *PLoS Pathogens*, 4(1), e9.  
445 <http://doi.org/10.1371/journal.ppat.0040009>
- 446 Sopko, R., Huang, D., Preston, N., Chua, G., Papp, B., Kafadar, K., ... Andrews, B. (2006). Mapping  
447 pathways and phenotypes by systematic gene overexpression. *Molecular Cell*, 21(3), 319–30.  
448 <http://doi.org/10.1016/j.molcel.2005.12.011>
- 449 Steidle, E. A., Chong, L. S., Wu, M., Crooke, E., Fiedler, D., Resnick, A. C., & Rolfes, R. J. (2016).  
450 A novel inositol pyrophosphate phosphatase in *Saccharomyces cerevisiae*: Siw14 protein  
451 selectively cleaves the  $\beta$ -phosphate from 5-diphosphoinositol pentakisphosphate (5PP-IP<sub>5</sub>). *The*

- 452 *Journal of Biological Chemistry*, 291(13), 6772–83. <http://doi.org/10.1074/jbc.M116.714907>
- 453 Szijgyarto, Z., Garedew, A., Azevedo, C., & Saiardi, A. (2011). Influence of inositol pyrophosphates  
454 on cellular energy dynamics. *Science*, 334(6057), 802–5. <http://doi.org/10.1126/science.1211908>
- 455 Wang, H., Gu, C., Rolfes, R. J., Jessen, H. J., & Shears, S. B. (2018). Structural and biochemical  
456 characterization of Siw14: A protein-tyrosine phosphatase fold that metabolizes inositol  
457 pyrophosphates. *The Journal of Biological Chemistry*, 293(18), 6905–6914.  
458 <http://doi.org/10.1074/jbc.RA117.001670>
- 459 York, J. D., Odom, A. R., Murphy, R., Ives, E. B., & Wentz, S. R. (1999). A phospholipase C-  
460 dependent inositol polyphosphate kinase pathway required for efficient messenger RNA export.  
461 *Science*, 285(5424), 96–100. Retrieved from <http://www.ncbi.nlm.nih.gov/pubmed/10390371>
- 462 Zurawski, D. V., Mumy, K. L., Faherty, C. S., McCormick, B. A., & Maurelli, A. T. (2009). *Shigella*  
463 *flexneri* type III secretion system effectors OspB and OspF target the nucleus to downregulate  
464 the host inflammatory response *via* interactions with retinoblastoma protein. *Molecular*  
465 *Microbiology*, 71(2), 350–68. <http://doi.org/10.1111/j.1365-2958.2008.06524.x>
- 466

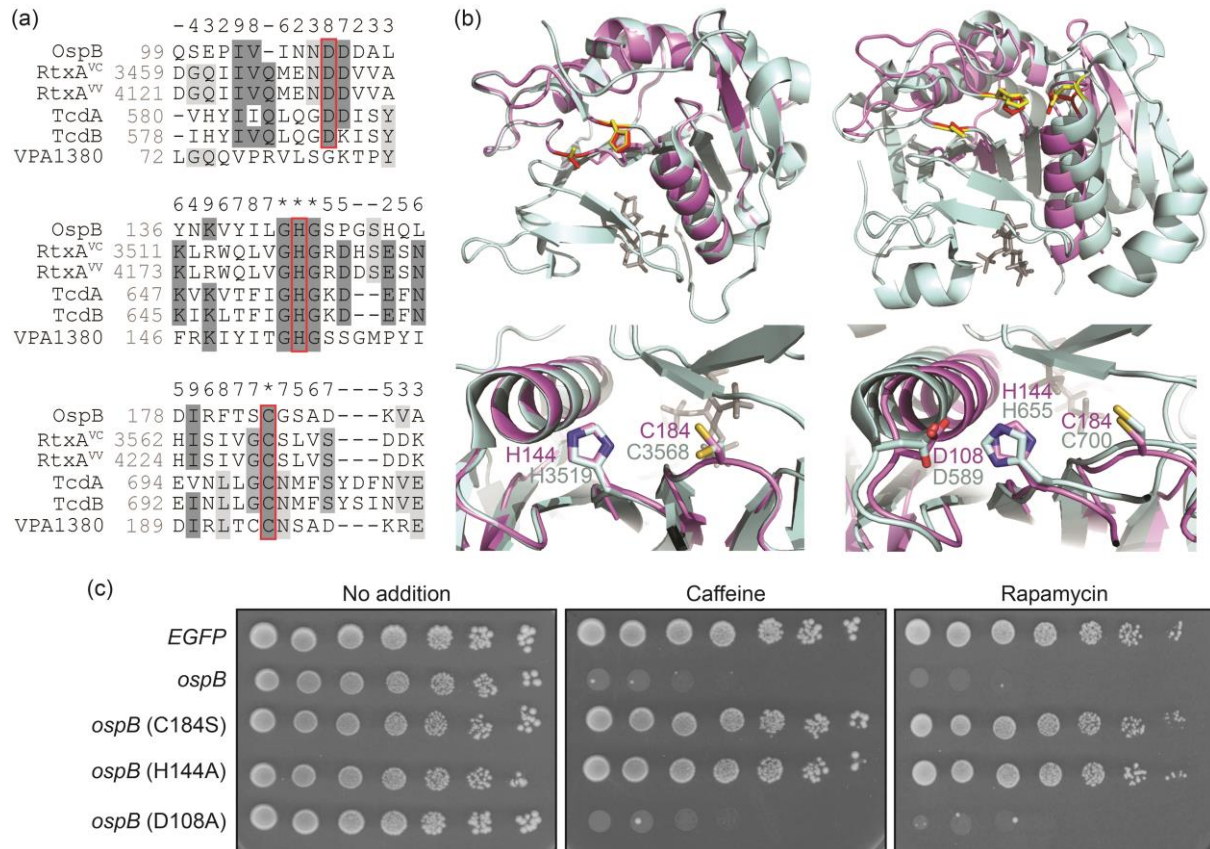

467

468 **Figure 1: Prediction of catalytic residues of OspB.** (a) Multiple sequence alignment of OspB with

469 the catalytic residues of the cysteine protease domains of RtxA from *V. cholerae* (RtxA<sup>VC</sup>) and *V.*

470 *vulnificus* (RtxA<sup>VV</sup>), *C. difficile* TcdA and TcdB, and the OspB ortholog VPA1380 from *V.*

471 *parahaemolyticus*. Red boxes indicate catalytic residues of the cysteine protease domains and the

472 aligned putative catalytic residues of OspB. Darkness of gray shading reflects the conservation of

473 individual residues, and the numbers above the alignment score the conservation at each position.

474 Asterisks denote full conservation among the aligned sequences. (b) Cartoon depictions of a tertiary

475 structure model of OspB (violet) on the CPDs of RtxA<sup>VC</sup> (left panels; PDB: 3EEB) and TcdA (right

476 panels; PDB: 3HO6) (pale cyan). In the top panels, the catalytic residues of the cysteine protease

477 domains are denoted by yellow sticks, with the putative catalytic residues of OspB shown as red sticks.

478 IP<sub>6</sub> in the RtxA<sup>VC</sup> and TcdB cysteine protease domain structures is shown in dark gray. Enlarged and

479 rotated views show the active sites (bottom panels), highlighting the superposition of the putative OspB

480 catalytic residues with those of the cysteine protease domains, labelled according to the color of the

481 cartoon. (c) Growth of yeast strains expressing *ospB* constructs or an *EGFP* control. Serial dilutions

482 were spotted on media either without additives or supplemented with the TOR inhibitors caffeine  
483 (6 mM) or rapamycin (5 nM). Images are representative of three independent replicates.

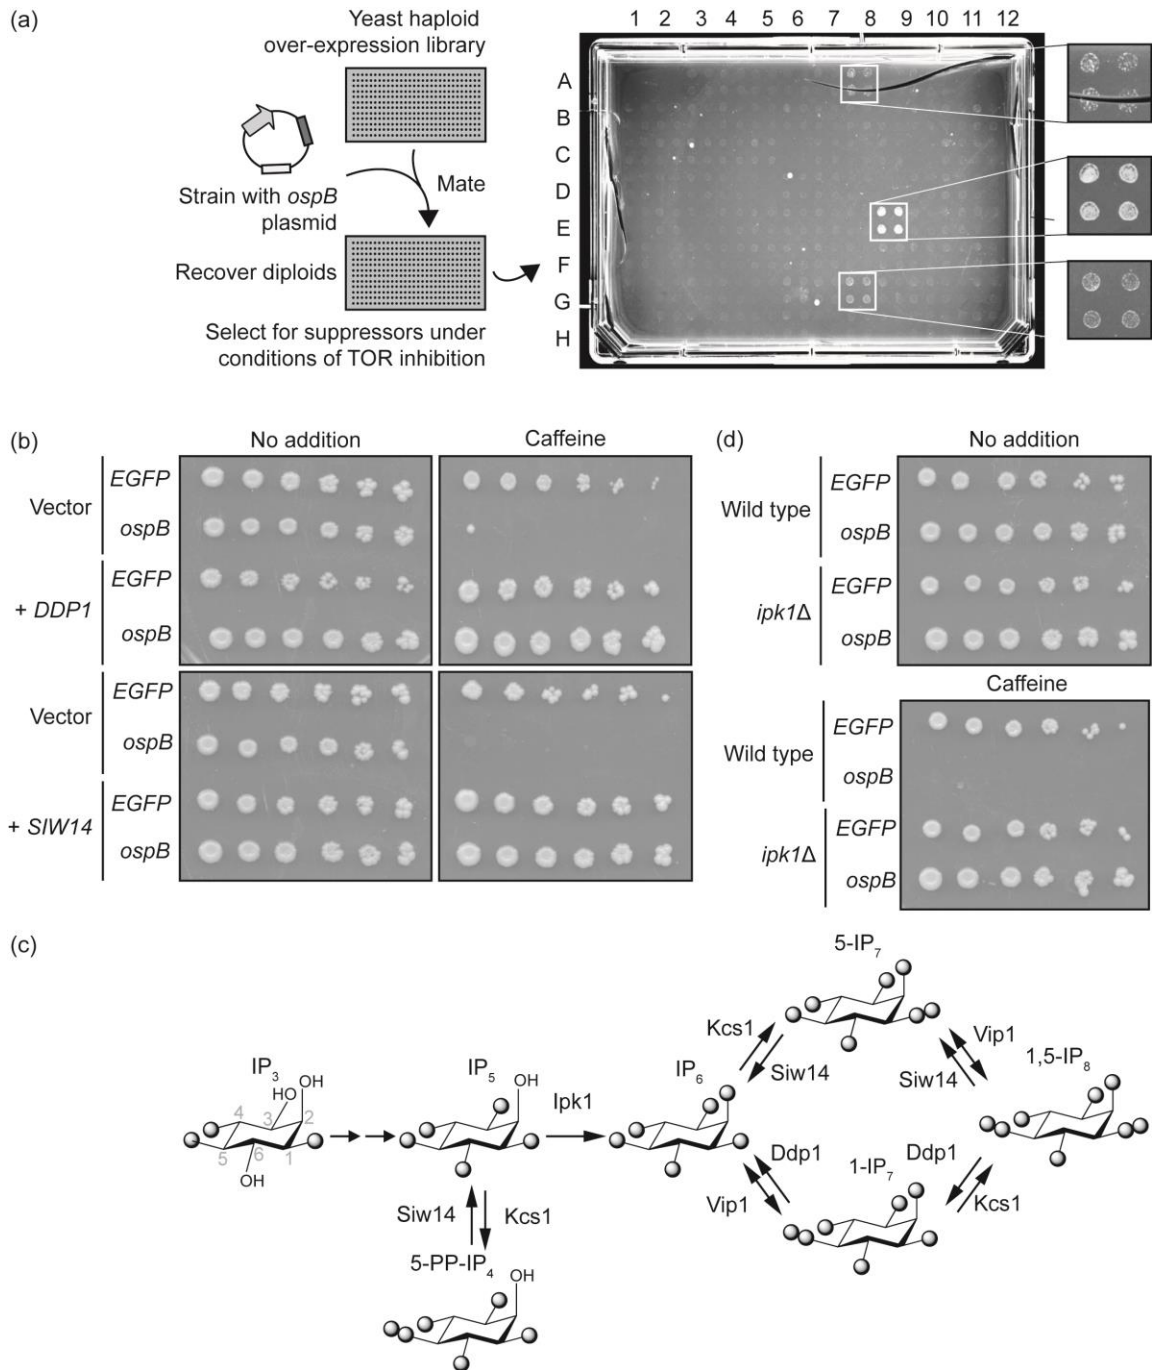

484

485 **Figure 2: A yeast suppressor screen reveals a role of inositol pyrophosphates in *OspB* activity.** (a)

486 Schematic of the over-expression library screen designed to identify suppressors of *OspB*-mediated

487 growth inhibition in the presence of caffeine (See Experimental Procedures for details). An example of

488 a quad-spotted output plate is shown, with three hits magnified. (b) Impact of multi-copy over-

489 expression of *DDP1* or *SIW14* on growth of yeast strains that express *ospB* or an *EGFP* control. Serial

490 dilutions were spotted in the presence or absence of the TOR inhibitor caffeine. Images are



491 representative of four independent replicates. (c) Schematic of the yeast soluble inositol phosphate  
492 biosynthetic pathway, with the kinase and phosphatase that catalyze each step indicated (dark gray  
493 lettering). The species names are shown in bold lettering. (d) Impact of deletion of *ipk1* on growth of  
494 yeast strains that express *ospB* or an *EGFP* control. Serial dilutions were spotted on media with or  
495 without caffeine. Images are representative of four independent replicates.

496

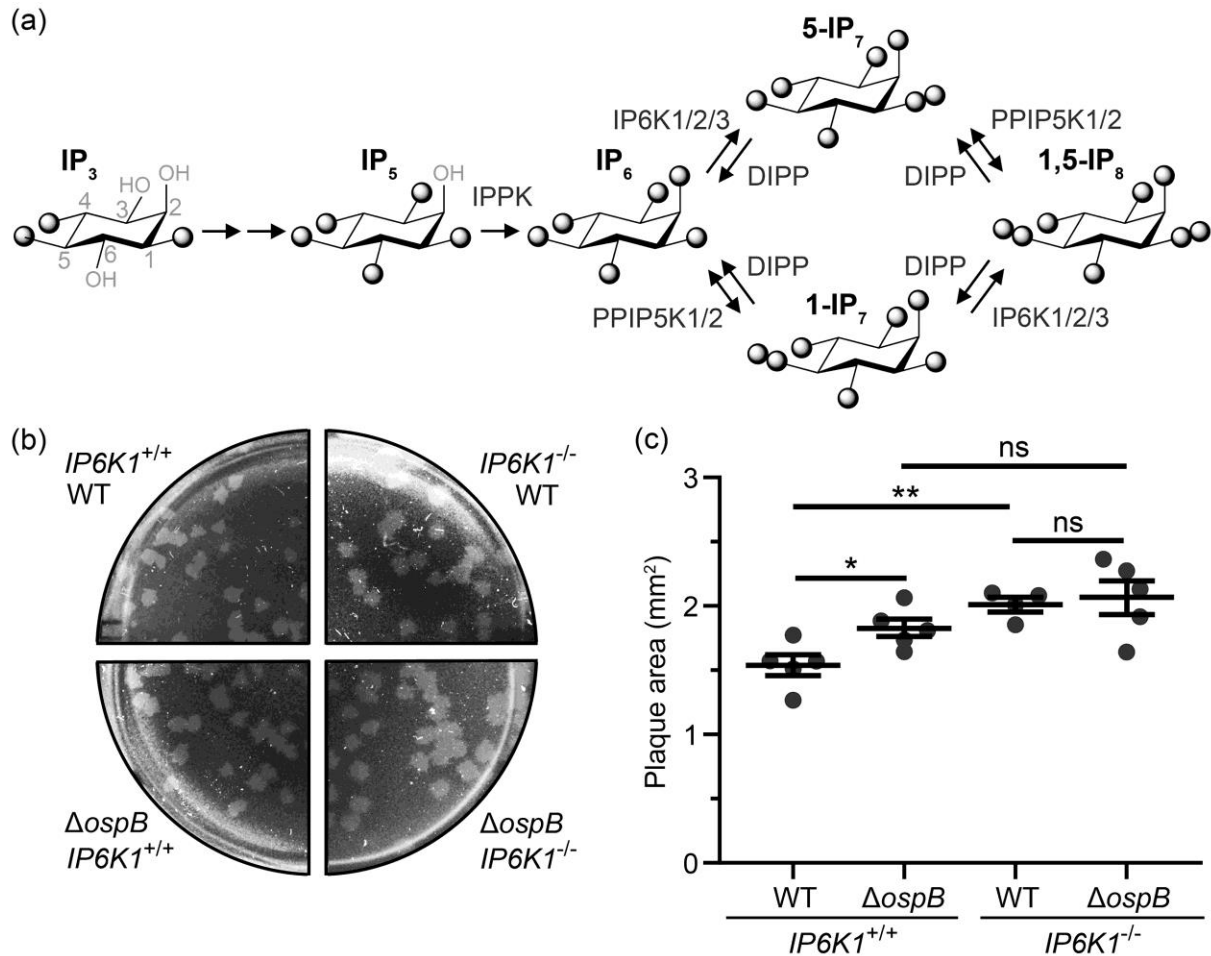

497

498 **Figure 3: Inositol pyrophosphate synthesis in mammalian cells alters activity of OspB during**  
 499 ***S. flexneri* infection.** (a) Schematic of the mammalian inositol phosphate biosynthetic pathway. Several  
 500 isoforms of enzymes are present at many positions in the pathway (dark gray lettering). Of note, it is  
 501 thought that the generation of 1,5-IP<sub>8</sub> from IP<sub>6</sub> primarily proceeds *via* 5-IP<sub>7</sub>, whereas most 1-IP<sub>7</sub> is  
 502 thought to be synthesized from 1,5-IP<sub>8</sub> (Gu et al., 2016). The species names are shown in bold lettering.  
 503 (b-c) Impact of deletion of *IP6K1* on *S. flexneri* spread through cell monolayers. Infection of *IP6K1*-  
 504 deficient mouse embryonic fibroblasts and littermate-derived wild type control cells with wild type  
 505 *S. flexneri* or an isogenic *ΔospB* mutant. Representative images of plaques (b) and quantification of  
 506 plaque area (c). Data are from at least 4 independent experiments. Two-tailed Student's *t*-test: \* *p* <  
 507 0.05; \*\* *p* < 0.01; ns, not significant).

508 **Supporting Information**

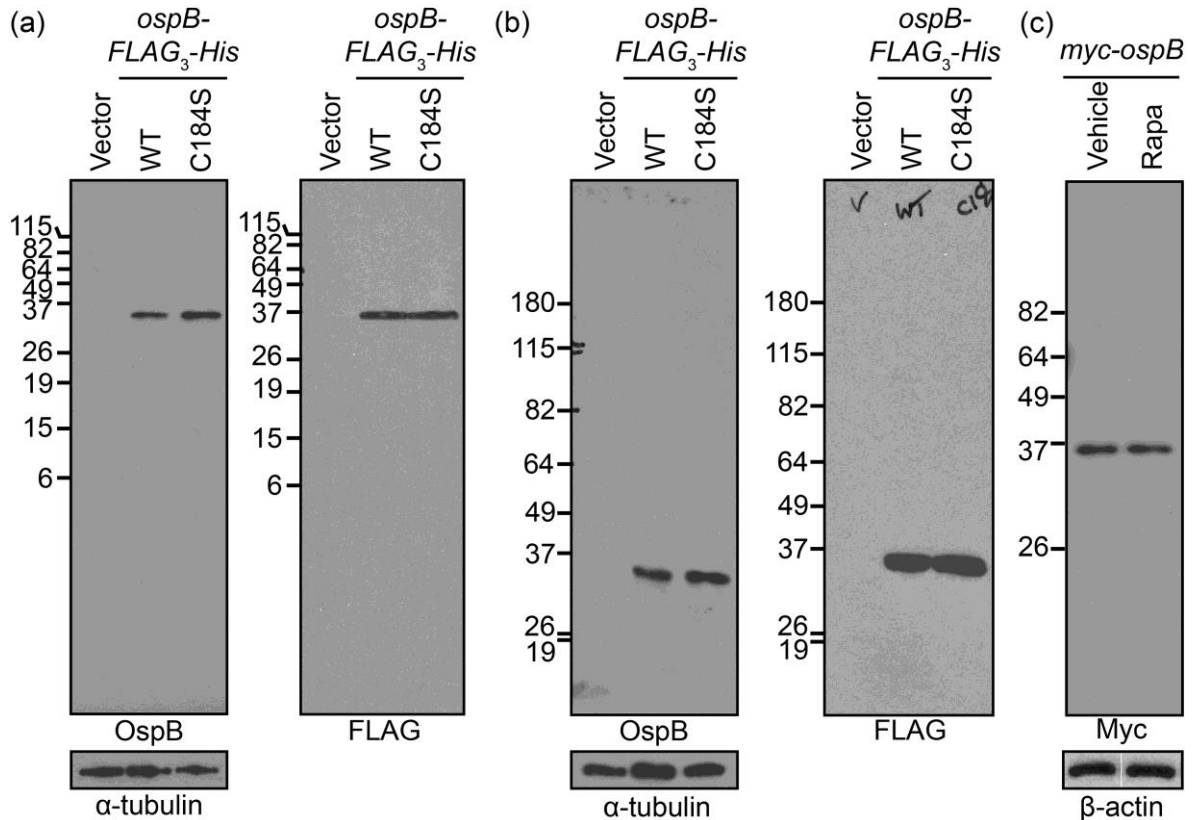

509

510 **Figure S1. Absence of evidence of processing of OspB in cell lysates.** (a) Wild type OspB and  
511 OspB (C184S) expressed in yeast, detected by immunoblotting with anti-OspB and anti-FLAG  
512 antibodies after separation on a 15% SDS-PAGE gel.  $\alpha$ -tubulin serves as a loading control. (b)  
513 Samples from panel (a) separated on a 7.5% SDS-PAGE gel and probed as in panel (a). (c)  
514 Transfection of mouse embryonic fibroblasts with pCMV-*myc-ospB*. Cells were treated with  
515 rapamycin (10 nM) (+) or a DMSO vehicle control. Myc-OspB detected by immunoblotting with an  
516 anti-myc antibody after separation on a 10% SDS-PAGE gel.  $\beta$ -actin serves as the loading control;  
517 bands from a single blot.

518

519 **Table S1: Yeast genes whose over-expression suppresses OspB-mediated growth inhibition of *S.***  
520 ***cerevisiae* in the presence of caffeine.**

521 The functions of the gene products are from the *Saccharomyces* genome database (Cherry et al., 2012).

522 Genes are listed alphabetically by name.

| Name         | Gene           | Function of gene product                              |
|--------------|----------------|-------------------------------------------------------|
| <i>BRE1</i>  | <i>YDL074C</i> | E3 ubiquitin ligase                                   |
| <i>CLN3</i>  | <i>YAL040C</i> | Regulatory subunit of cyclin-dependent protein kinase |
| <i>COS3</i>  | <i>YML132W</i> | Membrane protein turnover                             |
| <i>CSM1</i>  | <i>YCR086W</i> | Nucleolar protein involved in meiosis                 |
| <i>CYC3</i>  | <i>YAL039C</i> | Holocytochrome <i>c</i> synthase                      |
| <i>DDI1</i>  | <i>YER143W</i> | SNARE-binding protein                                 |
| <i>DDP1</i>  | <i>YOR163W</i> | Inositol pyrophosphate pathway phosphatase            |
| <i>EMA17</i> | <i>YIL029C</i> | Putative protein of unknown function                  |
| <i>FMT1</i>  | <i>YBL013W</i> | Methionyl-tRNA formyltransferase                      |
| <i>GAL11</i> | <i>YOL051W</i> | Subunit of RNA polymerase II mediator complex         |
| <i>HIS3</i>  | <i>YOR202W</i> | Histidine biosynthesis                                |
| <i>HSP60</i> | <i>YLR259C</i> | Mitochondrial chaperonin                              |
| <i>JJJ3</i>  | <i>YJR097W</i> | Putative protein of unknown function                  |
| <i>LAT1</i>  | <i>YNL071W</i> | Subunit of pyruvate dehydrogenase complex             |
| <i>LSB1</i>  | <i>YGR136W</i> | Negative regulator of actin nucleation                |
| <i>MTC6</i>  | <i>YHR151C</i> | Putative protein of unknown function                  |
| <i>PBY1</i>  | <i>YBR094W</i> | Putative tubulin tyrosine ligase                      |
| <i>PPE1</i>  | <i>YHR075C</i> | Carboxyl methyl esterase                              |
| <i>PRX1</i>  | <i>YBL064C</i> | Mitochondrial thioredoxin peroxidase                  |
| <i>PTC3</i>  | <i>YBL056W</i> | Type 2C protein phosphatase (PP2C)                    |
| <i>QCR6</i>  | <i>YFR033C</i> | Subunit of cytochrome <i>bc</i> <sub>1</sub> complex  |

|              |                |                                                   |
|--------------|----------------|---------------------------------------------------|
| <i>RIM11</i> | <i>YMR139W</i> | Protein kinase                                    |
| <i>SEC3</i>  | <i>YER008C</i> | Subunit of the exocyst complex                    |
| <i>SIW14</i> | <i>YNL032W</i> | Inositol pyrophosphate pathway phosphatase        |
| <i>SLX8</i>  | <i>YER116C</i> | Subunit of SUMO-targeted ubiquitin ligase complex |
| <i>TCB1</i>  | <i>YOR086C</i> | Endoplasmic reticulum-plasma membrane tethering   |
| <i>TKL2</i>  | <i>YBR117C</i> | Transketolase in the pentose phosphate pathway    |
| <i>UBC1</i>  | <i>YDR177W</i> | Ubiquitin conjugating enzyme                      |
| <i>UMP1</i>  | <i>YBR173C</i> | Chaperone                                         |
| <i>YUH1</i>  | <i>YJR099W</i> | Thiol-dependent ubiquitin-specific protease       |
| -            | <i>YAR023C</i> | Putative protein of unknown function              |
| -            | <i>YBL100C</i> | Putative protein of unknown function              |
| -            | <i>YBR116C</i> | Putative protein of unknown function              |
| -            | <i>YBR284W</i> | Putative metal-dependent hydrolase                |

523

524
