1                                   **The *Shigella* type III effector protein OspB is a cysteine protease**

2

3   Thomas E. Wood,<sup>1,2</sup> Kathleen A. Westervelt,<sup>1,3</sup> Jessica M. Yoon,<sup>4,7</sup> Heather D. Eshleman,<sup>1,2,8</sup> Roie  
4   Levy,<sup>1,2</sup> Henry Burnes,<sup>5</sup> Daniel J. Slade,<sup>6</sup> Cammie F. Lesser,<sup>1,2</sup> Marcia B. Goldberg<sup>1,2,\*</sup>

5

6   <sup>1</sup>Department of Medicine, Division of Infectious Diseases, Massachusetts General Hospital, Boston,  
7   Massachusetts, USA.

8   <sup>2</sup>Department of Microbiology, Blavatnik Institute, Harvard Medical School, Boston, Massachusetts,  
9   USA.

10   <sup>3</sup>Department of Immunology and Infectious Diseases, Harvard T. H. Chan School of Public Health,  
11   Boston, Massachusetts, USA.

12   <sup>4</sup>Department of Molecular and Cellular Biology, Harvard University, Cambridge, Massachusetts, USA.

13   <sup>5</sup>Department of Chemistry and Chemical Biology, Harvard University, Cambridge, Massachusetts,  
14   USA.

15   <sup>6</sup>Department of Biochemistry, Virginia Polytechnic Institute and State University, Blacksburg, Virginia,  
16   USA

17   <sup>7</sup>Present address: Office of Response and Recovery, Federal Emergency Management Agency,  
18   Washington, D.C., USA

19   <sup>8</sup>Present address: Lexical Intelligence, LLC, Rockville, Maryland, USA

20

21   \*For correspondence: E-mail: [marcia.goldberg@mg.harvard.edu](mailto:marcia.goldberg@mg.harvard.edu) Tel: +1 617-525-4820.

## 22 **Abstract**

23 The type III secretion system is required for virulence of many pathogenic bacteria. Bacterial effector  
24 proteins delivered into target host cells by this system modulate host signaling pathways and processes  
25 in a manner that promotes infection. Here, we define the activity of the effector protein OspB of the  
26 human pathogen *Shigella* spp., the etiological agent of shigellosis and dysenteric disease. Using the  
27 yeast *Saccharomyces cerevisiae* as a model organism, we show that OspB sensitizes cells to inhibition  
28 of TORC1, the central regulator of growth and metabolism. *In silico* analyses reveal that OspB bears  
29 structural homology to bacterial cysteine proteases, and we define a conserved cysteine-histidine  
30 catalytic dyad required for OspB function. Using yeast genetic screens, we identify a crucial role for  
31 the arginine N-degron pathway in the growth inhibition phenotype and show that inositol  
32 hexakisphosphate is an OspB cofactor. We find that a yeast substrate for OspB is the TORC1 component  
33 Tco89p, proteolytic cleavage of which generates a C-terminal fragment that is targeted for degradation  
34 via the arginine N-degron pathway; processing and degradation of Tco89p is required for the OspB  
35 phenotype. In all, we demonstrate that the *Shigella* T3SS effector OspB is a cysteine protease and  
36 decipher its interplay with eukaryotic cell processes.

37

## 38 **Importance**

39 *Shigella* spp. are important human pathogens and one of the leading causes of diarrheal mortality  
40 worldwide, especially in children. Virulence depends on the *Shigella* type III secretion system (T3SS),  
41 and definition of the roles of the bacterial effector proteins secreted by the T3SS is key to understanding  
42 *Shigella* pathogenesis. The effector protein OspB has been shown to contribute to a range of phenotypes  
43 during infection, yet the mechanism of action is unknown. Here, we show that OspB possesses cysteine  
44 protease activity in both yeast and mammalian cells, and that enzymatic activity of OspB depends on a  
45 conserved cysteine-histidine catalytic dyad. We determine how its protease activity sensitizes cells to  
46 TORC1 inhibition in yeast, finding that OspB cleaves a component of yeast TORC1, and that the  
47 degradation of the C-terminal cleavage product is responsible for OspB mediated hypersensitivity to

48 TORC1 inhibitors. Thus, OspB is a cysteine protease that depends on a conserved cysteine-histidine  
49 catalytic dyad.

50

## 51 **Keywords**

52 *Shigella*, OspB, cysteine protease, TORC1, N-degron

53

## 54 **Introduction**

55 Cellular processes are largely controlled by both the availability of nutrients and the ability to respond  
56 to these environmental cues. Consequently, homeostatic control of metabolism is crucial to function,  
57 growth and ultimately viability. The balance between anabolic and catabolic processes in eukaryotes is  
58 controlled by the target of rapamycin (TOR) complex, a large multi-subunit hub integrating sensory  
59 inputs to regulate cellular metabolism. In nutrient-replete conditions, amino acid and glucose  
60 availability sustains the kinase activity of the TORC1 complex, promoting translation, gene expression  
61 and protein stability. In contrast, cellular stresses and starvation inhibit TORC1-dependent growth and  
62 stimulate proteolytic mechanisms such as autophagy to maintain amino acid pools (González & Hall,  
63 2017).

64 Infection perturbs cellular homeostasis (Eisenreich et al., 2013). Pathogens that invade host cells disrupt  
65 cellular processes in ways that promote the survival and replication of the infectious agent. *Shigella*  
66 spp. are the etiological agent of bacillary dysentery and a leading contributor to diarrheal mortality  
67 (Khalil et al., 2018). This pathogen invades the intestinal epithelium, establishing a replicative niche  
68 within colonic epithelial cells and triggering an acute inflammatory immune response (Carayol & Tran  
69 Van Nhieu, 2013). The type III secretion system (T3SS) is required for *S. flexneri* infection, facilitating  
70 invasion and bacterial replication through the delivery into host cells of effector proteins that subvert  
71 cellular signaling pathways. Effector proteins also promote the spread of intracellular *Shigella* between  
72 cells, whereby it disseminates throughout the intestinal epithelium (Agaisse, 2016).

73 *Shigella* T3SS effector proteins display a myriad of well-characterized enzymatic activities including  
74 phosphatase, acyltransferase, ubiquitin ligase and protease functions, as well as catalyzing other more  
75 unconventional biochemical modifications (Burnaevskiy et al., 2013; H. Li et al., 2007; Z. Li et al.,  
76 2021; Liu et al., 2018; Niebuhr et al., 2002; Rohde et al., 2007; Zhang et al., 2012). The effector OspB  
77 has been described by our group and others as manipulating mTORC1 signaling, dampening the innate  
78 immune response *via* MAP kinase and NF- $\kappa$ B signaling, and modulating cytokine release (Ambrosi et  
79 al., 2015; Fukazawa et al., 2008; Zurawski et al., 2009). However, the precise mode of action of this  
80 effector protein is unknown.

81 In this study, we determine that the *S. flexneri* T3SS effector OspB is a cysteine protease. *In silico*  
82 analysis indicated structural homology to bacterial cysteine proteases, permitting identification of  
83 putative catalytic residues. Using a yeast model to study the impact of OspB activity on a eukaryotic  
84 host, we determine host factors required for OspB-dependent hypersensitivity to TORC1 inhibition,  
85 including inositol phosphate biosynthesis, TORC1 signaling, and protein degradation pathways. We  
86 find that the OspB-dependent hypersensitivity phenotype is due to the cleavage of the TORC1  
87 component Tco89p, in a manner that requires both the conserved catalytic dyad in OspB and the  
88 secondary messenger molecule inositol hexakisphosphate. Finally, we demonstrate that the C-terminal  
89 product of Tco89p cleavage enters the arginine N-degron pathway for destruction by the proteasome,  
90 and that its degradation is required for OspB-dependent growth inhibition of yeast.

## 91 **Results**

### 92 **OspB exhibits structural homology to cysteine proteases**

93 To gain insight into the potential mechanism of action of OspB, we performed *in silico* analyses of its  
94 amino acid sequence. This analysis revealed that OspB shares 27-30% sequence identity with the  
95 cysteine protease domains (CPD) of the large clostridial cytotoxins TcdA and TcdB of *Clostridioides*  
96 *difficile* and the multifunctional autoprocessing repeats-in-toxin (MARTX) RtxA toxins of *Vibrio*  
97 *cholerae* and *V. vulnificus* (**Fig. 1A**). TcdA, TcdB and RtxA are modular toxins that upon host cell  
98 endocytosis undergo autoproteolysis, which releases toxin domains that subvert cellular processes by

99 inducing actin depolymerization and altering GTPase signaling (Fullner & Mekalanos, 2000; Just et al.,  
100 1995). In contrast to these large cytotoxins, OspB is small (288 amino acids; 32 kD), and we found no  
101 evidence for OspB autoprocessing in cells (**Fig. S1** in the supplemental material).

102 The cysteine and histidine residues required for the proteolytic activity of the CPDs are conserved in  
103 OspB and the orthologous T3SS effector protein of *V. parahaemolyticus* VPA1380 (Calder et al., 2014;  
104 Egerer et al., 2007; Sheahan et al., 2007) (**Fig. 1A** and **Fig. S2A**). Indeed, the tertiary structure of OspB  
105 can be modelled on the CPDs of RtxA and TcdA with 96% and 62% confidence, respectively, with  
106 conservation of the positions of their catalytic residues with C184 and H144 of OspB (**Fig. 1B** and **Fig.**  
107 **S2B**). The alignment of OspB with the CPD structures suggested that OspB residues C184 and H144,  
108 may be required for OspB activity. A quantitative assay in yeast strains expressing *S. flexneri* effector  
109 proteins previously demonstrated that OspB causes growth inhibition of yeast in the presence of the  
110 cellular stressor caffeine (Slagowski et al., 2008). We utilized this assay to probe the role of the putative  
111 catalytic residues in OspB activity. Whereas expression of wild type OspB elicits a drastic growth defect  
112 in the presence of caffeine, mutation of either C184 or H144 completely abrogated toxicity (**Fig. 1C**).  
113 These data indicate that OspB inhibition of yeast growth depends on the predicted catalytic dyad of  
114 C184 and H144, bolstering our predictions for the tertiary structure of OspB as a structural homolog of  
115 the cysteine protease domains of several modular bacterial toxins.

116 Mutagenesis studies of TcdA showed that in addition to C700 and H655, D589 is required for  
117 autoprocessing through proton abstraction from the histidine in the active site (Pruitt et al., 2009). In  
118 RtxA, mutagenesis of the equivalent aspartic acid residue D3469 alone does not impact proteolytic  
119 activity; however concerted deletion of E3467 results in partial loss of autocleavage (Prochazkova &  
120 Satchell, 2008). In OspB an aspartic acid residue (D108) is predicted to be present at the equivalent  
121 position of D589<sup>TcdA</sup>, adjacent to two additional aspartic acid residues D109 and D110 (**Fig. S2A** and  
122 **S2B**). These were therefore candidates for involvement in catalysis. Alanine substitution of none of  
123 these aspartic acid residues rescued yeast growth (**Fig. S2C**). In addition, a D108A/D110A double  
124 mutant had no effect on OspB activity. These results indicate that the function of OspB requires both a  
125 cysteine and a histidine residue, similar to the cysteine-histidine catalytic dyad of the CPD of RtxA.

126 Among the effects of caffeine on cellular processes, inhibition of TORC1 is described as an important  
127 mode of action for this compound in yeast (Reinke et al., 2006). To determine whether the effect of  
128 caffeine on the OspB phenotype is specific to TORC1, we replaced caffeine in the media with  
129 rapamycin, which unlike caffeine is a specific inhibitor of TORC1. As with caffeine, the presence of  
130 rapamycin sensitized yeast to growth inhibition by OspB in a manner that depended on residues C184  
131 and H144 (**Fig. 1C**). These data indicate that the impact of OspB on yeast growth depends on inhibition  
132 of TORC1, consistent with our previous findings that OspB potentiates rapamycin inhibition of growth  
133 in mammalian cells (Lu et al., 2015). The presence of similar OspB-dependent phenotypes in both yeast  
134 and mammalian cells with respect to sensitization to TOR inhibition demonstrates that yeast present a  
135 reasonable model for investigating the mechanism of OspB activity.

#### 136 **Inositol hexakisphosphate is required for OspB activity**

137 With the goal of identifying host factors required for OspB activity, we screened a *S. cerevisiae* deletion  
138 library for strains in which OspB was no longer able to inhibit yeast growth in the presence of caffeine  
139 (**Fig. 2A**). The OspB-mediated growth defect was diminished in the absence of 81 genes, including  
140 several whose gene products act downstream of TORC1 (**Table S4**). Deletion of these genes would be  
141 expected to uncouple TORC1 signaling from its downstream transcriptional response, thereby  
142 decreasing the sensitivity to TORC1 inhibitors. This validates the ability of the screen to identify host  
143 factors required for the OspB-mediated growth phenotype and confirms a role of TORC1 signaling  
144 therein.

145 The screen also identified *IPK1*, which encodes the enzyme responsible for the generation of inositol  
146 hexakisphosphate (IP<sub>6</sub>), as required for yeast growth inhibition by OspB. Using an independent *ipk1*  
147 deletion strain, we confirmed that *IPK1* is required for OspB-mediated growth sensitivity to TORC1  
148 inhibitors and found that reintroduction of *IPK1 in trans* restored growth inhibition (**Fig. 2B**). Of note,  
149 IP<sub>6</sub> is an allosteric activator of the CPDs of RtxA and TcdA, and it is required for cysteine protease  
150 activity *in vitro* (Prochazkova & Satchell, 2008; Reineke et al., 2007). *In vitro* data assessing the role  
151 of IP<sub>6</sub> and a more highly phosphorylated inositol pyrophosphate species (IP<sub>7</sub>) in the autoprocessing of  
152 TcdB indicate that IP<sub>7</sub> is also a potent activator of TcdB cysteine protease activity (Savidge et al., 2011).

153 Since an *ipk1* mutant lacks IP<sub>6</sub> and all IP<sub>7</sub> and IP<sub>8</sub> inositol pyrophosphate species (Saiardi et al., 2002),  
154 we tested whether these inositol pyrophosphatase species were dispensable for OspB enzymatic activity  
155 by assessing growth inhibition in the absence of both yeast inositol hexakisphosphate kinases Kcs1p  
156 and Vip1p (Mulugu et al., 2007). The *kcs1Δvip1Δ* mutant still displayed OspB-dependent sensitivity to  
157 TORC1 inhibitors, indicating that IP<sub>6</sub> is sufficient to stimulate the activity of OspB (**Fig. 2C**).  
158 Furthermore, we confirmed previous data (Calder et al., 2014) that showed that IP<sub>6</sub> is sufficient for  
159 enzymatic activation of the OspB ortholog VPA1380 from *Vibrio parahaemolyticus* (**Fig. 2D**), pointing  
160 to the Ipk1p-dependency of VPA1380 for yeast growth inhibition resulting specifically from the loss of  
161 IP<sub>6</sub> rather than inositol pyrophosphate species.

### 162 **The arginine N-degron pathway is required for growth inhibition by OspB**

163 Our deletion screen for host factors required for OspB-mediated sensitization of yeast to TORC1  
164 inhibition also identified several components of the arginine N-degron pathway. This protein  
165 degradation pathway recognizes the neo-N-termini of polypeptides generated by cleavage or processing  
166 events and targets the polypeptides to the proteasome (Varshavsky, 2019). If the N-terminal residue of  
167 the C-terminal fragment produced upon protein cleavage is glutamine or asparagine, this destabilizes  
168 the fragment, directing its degradation *via* the arginine N-degron pathway (Gonda et al., 1989). The N-  
169 terminal Gln or Asn residue is deamidated to a Glu or Asp residue, respectively, by the N-terminal  
170 amidase Nta1p. The polypeptide is arginylated at the N-terminus by the arginine transferase Ate1p,  
171 permitting subsequent recruitment of the E3-E2 ubiquitin ligase N-recognin complex Ubr1p-Rad6p,  
172 which ubiquitinates the N-degron for degradation by the proteasome (**Fig. 3A**) (Baker & Varshavsky,  
173 1995; Bartel et al., 1990; Dohmen et al., 1991; Richter-Ruoff et al., 1992).

174 Deletion of *nta1*, *ate1*, *ubr1*, or *rad6* each rescued the growth inhibition phenotype catalyzed by OspB  
175 (**Fig. 3B**). Moreover, introduction of a plasmid expressing *NTA1* from its native promoter  
176 complemented the *nta1* mutant, whereas complementation with a *nta1*(C187S) allele, encoding a  
177 catalytically inactive amidase, did not restore OspB-dependent sensitivity to TORC1 inhibition (**Fig.**  
178 **3C** and **Fig. S3**). These results show that the host arginine N-degron pathway is required for growth

179 inhibition by OspB and suggests that the generation of an N-degron harboring an N-terminal Gln or  
180 Asn is a necessary step in this process.

181 A parallel screen using a yeast over-expression library (Sopko et al., 2006) to identify suppressors of  
182 OspB-mediated sensitivity to caffeine found that expression of *BRE1* from a multicopy vector rescued  
183 the OspB-dependent growth defect (**Table S5**). Bre1p is an E3 ubiquitin ligase that monoubiquitinates  
184 histone H2B to regulate chromatin structure, in conjunction with Rad6p as the E2 ubiquitin conjugating  
185 enzyme (Hwang et al., 2003; Wood et al., 2003). We hypothesized that the mechanism of rescue by  
186 Bre1 overexpression is its sequestration of Rad6p from the arginine N-degron pathway, effectively  
187 phenocopying a *rad6* mutant (**Fig. S4A**). We found that the E2 enzymatic activity of Rad6p is required  
188 for growth inhibition by OspB, since production of a catalytically inactive Rad6p (C88S) variant did  
189 not complement a *rad6* mutant, whereas the wild type *RAD6* allele did (**Fig. S4B**). In contrast,  
190 overexpression of a catalytically dead Bre1p (C663S) variant rescued the growth defect (**Fig. S4C**),  
191 indicating that the E3 ubiquitin ligase activity of Bre1p is dispensable for suppression of the OspB  
192 phenotype, consistent with the proposed mechanism of suppression being Rad6p sequestration.  
193 Expression of an additional copy of *RAD6* negated the suppression phenotype of Bre1p overexpression  
194 (**Fig. S4D**), suggesting that higher levels of Bre1p rescue growth through indirectly reducing flux  
195 through the arginine N-degron pathway. Taken together, these data demonstrate that the activity of the  
196 arginine N-degron pathway is critical for OspB to sensitize yeast to TORC1 inhibition.

197 VPA1380 expression is toxic to yeast even in the absence of TORC1 inhibitors, indicative of a  
198 mechanism divergent to that of OspB. In addition, the absence of *nta1* or other arginine N-degron  
199 pathway components did not perturb the growth inhibition elicited by VPA1380, suggesting that the  
200 outcome of its activity differs from that of OspB (**Fig. 3D & Fig. S5**). Furthermore, no role was found  
201 for the formyl-methionine or proline N-degron pathways (Chen et al., 2017; J.-M. Kim et al., 2018;  
202 Melnykov et al., 2019) in VPA1380-mediated growth inhibition (**Fig. S5**). Thus, despite the homology  
203 between OspB and VPA1380, and that both T3SS effectors inhibit yeast growth, these data suggest that  
204 these bacterial proteins elicit toxicity *via* divergent mechanisms.



## 205 **OspB cleaves the TORC1 component Tco89p**

206 Since yeast expressing OspB are sensitive to TORC1 inhibitors, we postulated that OspB either perturbs  
207 TORC1 signaling upstream of TORC1 or directly manipulates the TORC1 complex itself. Genetic  
208 ablation of individual nutrient sensing pathways upstream of TORC1 (**Fig. 4A**) (Binda et al., 2009;  
209 Dubouloz et al., 2005; Hughes Hallett et al., 2014; A. Kim & Cunningham, 2015; Yuan et al., 2017)  
210 did not rescue the OspB phenotype (**Fig. S6A**). With respect to *pib2*, which encodes a glutamine sensor  
211 that activates TORC1 in parallel to the amino acid-responsive Gtr1p/Gtr2p pathway (Tanigawa et al.,  
212 2021; Ukai et al., 2018), a yeast strain constitutively producing OspB in the absence of *pib2* could not  
213 be generated; however, expression of *ospB* from a galactose inducible promoter completely inhibited  
214 the growth of a *pib2* mutant without the need for low levels of caffeine or rapamycin (**Fig. 4B**). Genetic  
215 ablation of components of TORC1 or the Gtr1p/Gtr2p branch of amino acid sensing is synthetically  
216 lethal in a *pib2* $\Delta$  background (A. Kim & Cunningham, 2015), and we find that OspB is still toxic in a  
217 *gtr1* $\Delta$ *gtr2* $\Delta$  double mutant (**Fig. S6B**). We therefore conclude that OspB likely targets the TORC1  
218 complex itself.

219 We tested whether any of the four proteins that comprise the TORC1 complex - Kog1p, Lst8p, Tco89p  
220 and Tor1p/Tor2p (Reinke et al., 2004) – are perturbed by OspB activity. Among these four proteins,  
221 only Tor1p and Tco89p are non-essential. We found that neither the essential TORC1 components nor  
222 Tor1p is cleaved by OspB (**Fig. S7A**). Since deletion of *tco89* rendered yeast hypersensitive to  
223 rapamycin (Reinke et al., 2004), it was not possible to test for an effect of OspB in this growth assay.  
224 OspB-dependent sensitivity to TORC1 inhibitors was restored upon *TCO89* complementation (**Fig.**  
225 **4C**).

226 Assessment of Tco89p abundance revealed that in the presence of OspB, full length Tco89p levels were  
227 decreased and a faster migrating Tco89p band that was recognized by an antibody to the C-terminal tag  
228 was present (**Fig. 4D**). This faster migrating band was not observed in the presence of the catalytically  
229 inactive OspB C184S mutant, indicating that its generation depends on OspB catalytic activity and that  
230 the faster migrating band is a C-terminal Tco89p cleavage product. Overexpression of *TCO89* in wild

231 type yeast rescued the OspB-dependent growth defect (**Fig. 4E**), presumably because resulting increase  
232 in Tco89p levels likely raises the threshold at which sensitivity to TORC1 inhibitors occurs.

233 Cleavage of endogenous Tco89p was abolished in an *ipk1* background and restored by complementation  
234 of *IPK1*, indicating that requirements for the yeast growth phenotype are associated with the Tco89p cleavage phenotype  
235 (**Fig. 4F**). Tco89p cleavage by OspB was unaffected in a *kcs1Δvip1Δ* mutant (**Fig. S7B**), providing  
236 additional evidence that IP<sub>6</sub> is the inositol phosphate species acting as the cofactor for OspB protease  
237 activity. Transfection of mammalian cells with both OspB and Tco89p revealed that OspB cleavage of  
238 Tco89p occurs (**Fig. 4G**), which indicates that OspB functions as a protease in mammalian cells and  
239 suggests that Tco89p may be a direct substrate of OspB protease activity.

240 Processing of Tco89p by VPA1380 was not observed (**Fig. S8**), further supporting that the mechanisms  
241 of OspB and VPA1380 are divergent. Together, these data demonstrate that, upon its allosteric  
242 activation by IP<sub>6</sub>, OspB cleaves the TORC1 component Tco89p triggering sensitivity to inhibition of  
243 TORC1 signaling.

244 We assessed the role of the arginine N-degron pathway in the stability of the C-terminal Tco89p  
245 cleavage product generated by OspB. Treatment of yeast with the proteasome inhibitor MG-132  
246 increased the abundance of the Tco89p C-terminal fragment, indicating that this fragment is a substrate  
247 of the proteasome (**Fig. 5A**). Deletion of *nta1* resulted in an increase in the abundance of the Tco89p  
248 C-terminal fragment (**Fig. 5B**), and its levels were restored by reintroduction of *NTA1*, but not by  
249 reintroduction of the C187S inactive amidase mutant, indicating that the C-terminal fragment of Tco89p  
250 is the N-degron that mediates growth inhibition caused by the protease activity of OspB.

251 In summary, we found that the *Shigella* T3SS effector OspB is a cysteine protease that cleaves the  
252 TORC1 component Tco89p, thereby generating an N-degron, and that the N-degron is targeted for  
253 degradation by the arginine N-degron pathway (**Fig. 5C**). Cleavage of Tco89p by OspB and host-  
254 mediated degradation of the C-terminal fragment is responsible for sensitization of the TORC1 complex  
255 to inhibition and the associated inhibition of yeast growth.

## 256 Discussion

257 The evidence presented here collectively demonstrates that the *Shigella* T3SS effector OspB is a  
258 cysteine protease and that it requires inositol hexakisphosphate for its activity. OspB is required for  
259 cleavage of Tco89p, a component of yeast TORC1, and upon expression of the two proteins in  
260 mammalian cells, OspB is sufficient to cleave Tco89p (**Fig. 4**), indicating that OspB mediated cleavage  
261 of Tco89p is either direct or depends on factors that are conserved between yeast and mammalian cells.  
262 OspB is structurally homologous to the cysteine protease domains of the bacterial MARTX toxins  
263 TcdA, TcdB and RtxA, with conservation of the catalytic cysteine and histidine residues (**Fig. 1 and**  
264 **S2**) (Egerer et al., 2007; Lupardus et al., 2008; Reineke et al., 2007; Shen et al., 2009). In OspB, the  
265 conserved cysteine and histidine are each required for both the OspB growth inhibition phenotype in  
266 yeast and Tco89p cleavage in yeast and mammalian cells (**Fig. 4** and data not shown).

267 Like TcdA, TcdB and RtxA, OspB requires inositol hexakisphosphate for its activity (**Fig. 2 and 4**)  
268 (Egerer & Satchell, 2010). Using a genetic approach, we exclude inositol pyrophosphate species as  
269 being necessary for OspB activity and define the inositol phosphate species requirement as IP<sub>6</sub>;  
270 however, it is possible that an inositol pyrophosphate species may be sufficient for stimulating activity  
271 *in vitro*, as found for IP<sub>7</sub> and *C. difficile* TcdB (Savidge et al., 2011). The requirement for a host-specific  
272 cofactor, such as IP<sub>6</sub>, ubiquitin, calmodulin, or cyclophilins, for the activation bacterial effectors is  
273 increasingly appreciated (Anderson et al., 2011; Coaker et al., 2005; Drum et al., 2002; Mittal et al.,  
274 2010; Sreelatha et al., 2020; Tyson & Hauser, 2013) and necessarily restricts enzymatic activity to the  
275 context of host infection. Together, these findings provide strong evidence that OspB is a cysteine  
276 protease in the family of proteases represented by the cysteine protease domains of the MARTX toxins  
277 and large clostridial cytotoxins.

278 Two other *Shigella* T3SS effectors, IpaJ and OspD3, are also cysteine proteases. IpaJ and OspD3 are  
279 divergent from OspB and their substrates are distinct, constituting Rho GTPases and necroptotic  
280 signaling factors, respectively (Ashida et al., 2020; Burnaevskiy et al., 2015). Genes encoding T3SS  
281 effector proteins are often acquired by horizontal gene transfer (Brown & Finlay, 2011), thus  
282 homologous effectors are commonly secreted by the T3SSs of pathogens displaying similar host

283 tropism. The T3SS2 effector of *V. parahaemolyticus* VPA1380 is homologous to OspB, yet we find  
284 that it likely targets a different host substrate. First, yeast growth inhibition by OspB requires reduction  
285 of TORC1 activity by either chemical or genetic intervention (**Fig. 1** and **4**), whereas VPA1380 is toxic  
286 to yeast in the absence of additional stressors (**Fig. 2**) (Calder et al., 2014). Second, we find that  
287 VPA1380 neither cleaves Tco89p nor generates a substrate cleavage product that requires the arginine  
288 N-degron pathway for its degradation (**Fig. 3**, **S5**, and **S8**).

289 OspB cleaves a component of TORC1 to produce a C-terminal fragment that enters the arginine N-  
290 degron pathway for proteasomal degradation, rendering the cells hypersensitive to TOR inhibition.  
291 Tco89p cleavage and degradation appears to be entirely responsible for the TOR inhibitor  
292 hypersensitivity phenotype stimulated by OspB, as degradation of the C-terminal fragment phenocopies  
293 a *tco89Δ* mutant growth defect in the presence of either rapamycin or caffeine (**Fig. 4C**) (Reinke et al.,  
294 2004, 2006; Slagowski et al., 2008). Consequently, complementation with multi-copy Tco89p is  
295 associated with reduced sensitivity to inhibition of TORC1 by a combination of OspB and chemical  
296 inhibitors (**Fig. 4E**). The dependence on *NTAI*, the upstream-most enzyme in the arginine N-degron  
297 pathway (**Fig. 3**), indicates that OspB cleavage results in a tertiary arginine N-degron, with glutamine  
298 or asparagine at the neo-N-terminus of the C-terminal Tco89p cleavage product, since deamidation of  
299 the product by Nta1p is a critical step in its degradation (Gonda et al., 1989).

300 The migration of Tco89p constructs in SDS-PAGE is slower (at around 150 kD) than expected for the  
301 89 kD protein (**Fig. 4**). We hypothesize that the retarded migration of Tco89p is due to significant  
302 phosphorylation by the TORC1 kinase (Huber et al., 2009; Oliveira et al., 2015). Irrespective of the  
303 cause, prediction of the OspB cleavage site producing the C-terminal fragment cannot be based on gel  
304 migration. Tco89p is an intrinsically disordered protein and these proteins are often enriched in  
305 phosphorylation sites (Miao et al., 2018). Moreover, post-translational modification is a frequent  
306 regulator of intrinsically disordered proteins, so it is conceivable that TORC1 regulates its own function  
307 by altering the phosphorylation state of Tco89p, consistent with a role for this protein in formation of  
308 inhibitory TORC1 “body” formation during glucose and nitrogen starvation (Hughes Hallett et al.,  
309 2015; Sullivan et al., 2019).

310 Of note, there is no obvious homolog of Tco89p in mammalian cells. However, since Tco89p is  
311 intrinsically disordered, due to the absence of structural constraints, it would be expected to have  
312 evolved rapidly and to have undergone positive selection at specific sites, resulting in the acquisition of  
313 new functions (Afanasyeva et al., 2018), leading us to postulate that the mammalian functional homolog  
314 is divergent at the sequence level. Notwithstanding this potential lack of recognizable sequence identity,  
315 our yeast OspB phenotype of sensitization to TOR inhibition is similar to our prior finding of OspB  
316 mediated sensitization to rapamycin in fibroblasts (Lu et al., 2015), bolstering the relevance of the yeast  
317 model.

318 The potential utility of identifying a substrate of a microbial protease in a heterologous system, as we  
319 did here for OspB, is exemplified by the work leading to the identification of the physiological ligand  
320 of the NLRP1 inflammasome. The *Bacillus anthracis* lethal factor protease efficiently cleaves a  
321 disordered linker in murine NLRP1B and rat NLRP1, releasing an arginine N-degron, degradation of  
322 which led to inflammasome activation in macrophages and pyroptotic cell death (Boyden & Dietrich,  
323 2006; Levinsohn et al., 2012; Wickliffe et al., 2008). Anthrax is primarily a pathogen of humans, and  
324 lethal factor does not cleave the human NLRP1 homolog (Chavarría-Smith et al., 2016). Yet, these  
325 studies facilitated the recent determination that dependence on functional degradation is a conserved  
326 feature of NLRP1 activation (Chui et al., 2019; Sandstrom et al., 2019; Xu et al., 2019), and the  
327 subsequent molecular identification of enteroviral proteases as the physiological activators of the human  
328 NLRP1 inflammasome, in which cleavage of the aforementioned disordered linker generates a glycine  
329 N-degron (Robinson et al., 2020; Tsu et al., 2021). By analogy, through determination of the activity of  
330 OspB, our study provides an important insight into its substrate specificity and phenotypic impact,  
331 which will facilitate identification of mammalian substrates.

### 332 **Acknowledgments**

333 We thank Austin C. Hachey and Yang Fu for technical assistance, and Ted Powers and Nick Laribee  
334 for the gift of yeast strains. The work was supported by Department of Defense grant TS160046 (to  
335 M.B.G.), funding from the Massachusetts General Hospital Executive Committee on Research (to

336 M.B.G.), NIH grants T32 AI007061 and F32 AI131582 (to H.D.E.), and R01 AI064285 (to C.F.L.).

337 The authors have no conflicts of interest.

## 338 **Materials and Methods**

### 339 **Strains and media**

340 All strains, plasmids and primers are listed in **Table S1, S2 and S3**, respectively. *E. coli* DH10B (Grant  
341 et al., 1990) was used as the routine cloning host and was grown in Luria broth at 37 °C with agitation.  
342 *S. cerevisiae* S288C was used as the heterologous expression host to probe the roles of host proteins in  
343 the function of OspB and was routinely cultured at 30 °C in yeast extract-peptone-dextrose (YPD) broth  
344 or in synthetic selective media (MP Biomedicals) lacking histidine, uracil and/or leucine for auxotrophic  
345 selection. 1.5 % (w/v) agar was added for solid media formulations, and where appropriate, media was  
346 supplemented with 50 µg/ml ampicillin (Sigma, A9518), 2% (w/v) D-glucose (Fisher Scientific, D16-  
347 10), 2% D-(+)-raffinose (Sigma, R7630), 2% (w/v) D-galactose (VWR, 200001-176), 300 µg/ml  
348 hygromycin (Gibco, 10687010), 200 µg/ml geneticin (Sigma, A1720). For TORC1 inhibition, solid  
349 media was supplemented with 6 mM caffeine (Sigma, C0750) or 5 nM rapamycin (Sigma, 553211)  
350 unless stated otherwise. For proteasome inhibition, media was supplemented with 75 µM MG-132  
351 (Selleck Chemicals, S2619) and 0.003% SDS. Yeast strains were transformed using the standard  
352 lithium acetate method.

### 353 **Bioinformatic analyses**

354 *In silico* modelling of the tertiary structure of OspB was conducted on the Phyre2 server (Kelley et al.,  
355 2015), whereas alignment with the crystal structures of RtxA<sup>VC</sup> (Lupardus et al., 2008) and TcdA (Pruitt  
356 et al., 2009) was achieved using the CEAlign algorithm within PyMol (Schrödinger, LLC). Protein  
357 sequences were retrieved from the non-redundant NCBI database and aligned using MUSCLE (Edgar,  
358 2004) before manual curation to select the regions of interest.

### 359 **Yeast growth assays and protein extraction**

360 Individual yeast transformants that constitutively express *ospB* or derivatives containing point  
361 mutations were grown in synthetic selective liquid media containing 2% D-glucose. To investigate the

362 impact of OspB constructs on growth, yeast cells were washed and serially diluted four-fold in  
363 phosphate-buffered saline before 5  $\mu$ l of each dilution were spotted on synthetic selective solid media  
364 with additives as appropriate. Assessment of protein production was done from liquid cultures. Here,  
365 subcultures were inoculated at OD<sub>600</sub> 2.0 from overnight cultures and grown for two hours before  
366 harvesting for SDS-PAGE analysis using the alkaline lysis method (Kushnirov, 2000). Where construct  
367 induction was required, yeast strains were subcultured in 2% raffinose for 2 h, before supplementation  
368 with 2% galactose. Samples were harvested after four hours of protein expression. For proteasome  
369 inhibition, yeast strains were subcultured in glucose for 2 h before treatment with MG-132 or DMSO  
370 control for 3 h.

### 371 **Yeast library screening**

372 To screen for suppressors of OspB-mediated toxicity in *S. cerevisiae* by yeast gene over-expression, the  
373 strain BY4742 pAG413GPD-*ospB* was mated with the haploid GST-fusion yeast over-expression  
374 library (Dharmacon, YSC4423) on YPD. The resulting diploids were selected by plating on non-  
375 inducing synthetic selective media containing 2% D-glucose. The screen was conducted by spotting in  
376 quadruplicate on inducing synthetic selective solid media containing 2% D-galactose and 6 mM  
377 caffeine. All steps in the screen were conducted in an automated manner as described previously  
378 (Slagowski et al., 2008). Suppressors were classified as strains which displayed qualitatively moderate  
379 to robust growth of all four spots on the caffeine plate four days after pinning. To screen for *S. cerevisiae*  
380 host factors required for OspB-dependent growth inhibition, we screened the MATa haploid deletion  
381 library (Horizon, YSC1053) as previously described (Kramer et al., 2007), but with transformation of  
382 the plasmid pAG413GAL-*ospB* and assessment of growth on synthetic selective solid media containing  
383 2% D-galactose and 6 mM caffeine after 3 days.

### 384 **Cell culture and transfection**

385 HEK293T (ATCC) and mouse embryonic fibroblast cells (Lu et al., 2015) were maintained in  
386 Dulbecco's modified Eagle medium (DMEM) (Gibco) supplemented with 10% (v/v) fetal bovine serum

387 at 37 °C with 5% CO<sub>2</sub>. Cells were transfected with plasmids using FuGENE6 (Promega) according to  
388 the manufacturer's instructions, and experimental samples were analyzed 24-48 h after transfection.

### 389 **SDS-PAGE and immunoblotting**

390 For immunoblot analysis, protein samples were separated by SDS-PAGE, transferred to nitrocellulose  
391 membranes and detected by western blot analysis using standard procedures. The antibodies used were  
392 peroxidase-conjugated anti-β-actin (Sigma, A3854; diluted to 1:10 000), anti-α-tubulin (Santa Cruz, sc-  
393 53030; diluted to 1:1000), anti-FLAG (Sigma, F3165; diluted to 1:1000), anti-myc (EMD Millipore 05-  
394 724; diluted to 1:1000), anti-HA (Biolegend, 901501, diluted to 1:1000) and anti-OspB (diluted to 1:10  
395 000). The rabbit anti-OspB antibody was generated (Covance Inc.) against a 14-mer peptide of OspB  
396 located 18 residues from the C-terminus.

### 397 **References**

- 398 Afanasyeva, A., Bockwoltd, M., Cooney, C. R., Heiland, I., & Gossmann, T. I. (2018). Human long  
399 intrinsically disordered protein regions are frequent targets of positive selection. *Genome Research*,  
400 28(7), 975–982. <https://doi.org/10.1101/gr.232645.117>
- 401 Agaisse, H. (2016). Molecular and Cellular Mechanisms of *Shigella flexneri* Dissemination. *Frontiers*  
402 *in Cellular and Infection Microbiology*, 6(March), 29. <https://doi.org/10.3389/fcimb.2016.00029>
- 403 Ambrosi, C., Pompili, M., Scribano, D., Limongi, D., Petrucca, A., Cannavacciuolo, S., Schippa, S.,  
404 Zagaglia, C., Grossi, M., & Nicoletti, M. (2015). The *Shigella flexneri* OspB effector: an early  
405 immunomodulator. *International Journal of Medical Microbiology*, 305(1), 75–84.  
406 <https://doi.org/10.1016/j.ijmm.2014.11.004>
- 407 Anderson, D. M., Schmalzer, K. M., Sato, H., Casey, M., Terhune, S. S., Haas, A. L., Feix, J. B., &  
408 Frank, D. W. (2011). Ubiquitin and ubiquitin-modified proteins activate the *Pseudomonas aeruginosa*  
409 T3SS cytotoxin, ExoU. *Molecular Microbiology*, 82(6), 1454–1467. <https://doi.org/10.1111/j.1365-2958.2011.07904.x>
- 411 Ashida, H., Sasakawa, C., & Suzuki, T. (2020). A unique bacterial tactic to circumvent the cell death  
412 crosstalk induced by blockade of caspase-8. *The EMBO Journal*, 1–16.  
413 <https://doi.org/10.15252/emboj.2020104469>
- 414 Baker, R. T., & Varshavsky, A. (1995). Yeast N-terminal amidase: a new enzyme and component of  
415 the N-end rule pathway. *The Journal of Biological Chemistry*, 270(20), 12065–12074.  
416 <https://doi.org/10.1074/JBC.270.20.12065>
- 417 Bartel, B., Wüning, I., & Varshavsky, A. (1990). The recognition component of the N-end rule  
418 pathway. *The EMBO Journal*, 9(10), 3179–3189. <https://doi.org/10.1002/j.1460-2075.1990.tb07516.x>
- 419 Binda, M., Péli-Gulli, M.-P., Bonfils, G., Panchaud, N., Urban, J., Sturgill, T. W., Loewith, R., & De



- 420 Virgilio, C. (2009). The Vam6 GEF controls TORC1 by activating the EGO complex. *Molecular Cell*,  
421 35(5), 563–573. <https://doi.org/10.1016/j.molcel.2009.06.033>
- 422 Boyden, E. D., & Dietrich, W. F. (2006). *Nalp1b* controls mouse macrophage susceptibility to anthrax  
423 lethal toxin. *Nature Genetics*, 38(2), 240–244. <https://doi.org/10.1038/ng1724>
- 424 Brown, N. F., & Finlay, B. (2011). Potential origins and horizontal transfer of type III secretion  
425 systems and effectors. *Mobile Genetic Elements*, 1(2), 118–121.  
426 <https://doi.org/10.4161/mge.1.2.16733>
- 427 Burnaevskiy, N., Fox, T. G., Plymire, D. A., Ertelt, J. M., Weigele, B. A., Selyunin, A. S., Way, S. S.,  
428 Patrie, S. M., & Alto, N. M. (2013). Proteolytic elimination of *N*-myristoyl modifications by the  
429 *Shigella* virulence factor IpaJ. *Nature*, 496(7443), 106–109. <https://doi.org/10.1038/nature12004>
- 430 Burnaevskiy, N., Peng, T., Reddick, L. E., Hang, H. C., & Alto, N. M. (2015). Myristoylome profiling  
431 reveals a concerted mechanism of ARF GTPase deacylation by the bacterial protease IpaJ. *Molecular*  
432 *Cell*, 58(1), 110–122. <https://doi.org/10.1016/j.molcel.2015.01.040>
- 433 Calder, T., Kinch, L. N., Fernandez, J., Salomon, D., Grishin, N. V., & Orth, K. (2014). *Vibrio* type  
434 III effector VPA1380 is related to the cysteine protease domain of large bacterial toxins. *PLoS ONE*,  
435 9(8), e104387. <https://doi.org/10.1371/journal.pone.0104387>
- 436 Carayol, N., & Tran Van Nhieu, G. (2013). The inside story of *Shigella* invasion of intestinal  
437 epithelial cells. *Cold Spring Harbor Perspectives in Medicine*, 3(10), a016717.  
438 <https://doi.org/10.1101/cshperspect.a016717>
- 439 Chavarría-Smith, J., Mitchell, P. S., Ho, A. M., Daugherty, M. D., & Vance, R. E. (2016). Functional  
440 and Evolutionary Analyses Identify Proteolysis as a General Mechanism for NLRP1 Inflammasome  
441 Activation. *PLoS Pathogens*, 12(12), e1006052. <https://doi.org/10.1371/journal.ppat.1006052>
- 442 Chen, S.-J., Wu, X., Wadas, B., Oh, J.-H., & Varshavsky, A. (2017). An N-end rule pathway that  
443 recognizes proline and destroys gluconeogenic enzymes. *Science*, 355(6323).  
444 <https://doi.org/10.1126/science.aal3655>
- 445 Chui, A. J., Okondo, M. C., Rao, S. D., Gai, K., Griswold, A. R., Johnson, D. C., Ball, D. P.,  
446 Taabazuing, C. Y., Orth, E. L., Vittimberga, B. A., & Bachovchin, D. A. (2019). N-terminal  
447 degradation activates the NLRP1B inflammasome. *Science*, 1208(March), 317826.  
448 <https://doi.org/10.1126/science.aau1208>
- 449 Coaker, G., Falick, A., & Staskawicz, B. J. (2005). Activation of a phytopathogenic bacterial effector  
450 protein by a eukaryotic cyclophilin. *Science*, 308(5721), 548–550.  
451 <https://doi.org/10.1126/science.1108633>
- 452 Dohmen, R. J., Madura, K., Bartel, B., & Varshavsky, A. (1991). The N-end rule is mediated by the  
453 UBC2(RAD6) ubiquitin-conjugating enzyme. *Proceedings of the National Academy of Sciences of the*  
454 *United States of America*, 88(16), 7351–7355. <https://doi.org/10.1073/pnas.88.16.7351>
- 455 Drum, C. L., Yan, S.-Z., Bard, J., Shen, Y.-Q., Lu, D., Soelaiman, S., Grabarek, Z., Bohm, A., &  
456 Tang, W.-J. (2002). Structural basis for the activation of anthrax adenylyl cyclase exotoxin by  
457 calmodulin. *Nature*, 415(6870), 396–402. <https://doi.org/10.1038/415396a>
- 458 Dubouloz, F., Deloche, O., Wanke, V., Cameroni, E., & De Virgilio, C. (2005). The TOR and EGO  
459 Protein Complexes Orchestrate Microautophagy in Yeast. *Molecular Cell*, 19(1), 15–26.

- 460 <https://doi.org/10.1016/j.molcel.2005.05.020>
- 461 Edgar, R. C. (2004). MUSCLE: multiple sequence alignment with high accuracy and high throughput.  
462 *Nucleic Acids Research*, 32(5), 1792–1797. <https://doi.org/10.1093/nar/gkh340>
- 463 Egerer, M., Giesemann, T., Jank, T., Satchell, K. J. F., & Aktories, K. (2007). Auto-catalytic cleavage  
464 of *Clostridium difficile* toxins A and B depends on cysteine protease activity. *The Journal of*  
465 *Biological Chemistry*, 282(35), 25314–25321. <https://doi.org/10.1074/jbc.M703062200>
- 466 Egerer, M., & Satchell, K. J. F. (2010). Inositol Hexakisphosphate-Induced Autoprocessing of Large  
467 Bacterial Protein Toxins. *PLoS Pathogens*, 6(7), e1000942.  
468 <https://doi.org/10.1371/journal.ppat.1000942>
- 469 Eisenreich, W., Heesemann, J., Rudel, T., & Goebel, W. (2013). Metabolic host responses to infection  
470 by intracellular bacterial pathogens. *Frontiers in Cellular and Infection Microbiology*, 3(JUL), 1–22.  
471 <https://doi.org/10.3389/fcimb.2013.00024>
- 472 Fukazawa, A., Alonso, C., Kurachi, K., Gupta, S., Lesser, C. F., McCormick, B. A., & Reinecker, H.-  
473 C. (2008). GEF-H1 mediated control of NOD1 dependent NF- $\kappa$ B activation by *Shigella* effectors.  
474 *PLoS Pathogens*, 4(11), e1000228. <https://doi.org/10.1371/journal.ppat.1000228>
- 475 Fullner, K. J., & Mekalanos, J. J. (2000). *In vivo* covalent cross-linking of cellular actin by the *Vibrio*  
476 *cholerae* RTX toxin. *The EMBO Journal*, 19(20), 5315–5323.  
477 <https://doi.org/10.1093/emboj/19.20.5315>
- 478 Gonda, D. K., Bachmair, A., Wüning, I., Tobias, J. W., Lane, W. S., & Varshavsky, A. (1989).  
479 Universality and Structure of the N-end Rule. *Journal of Biological Chemistry*, 264(28), 16700–  
480 16712. [https://doi.org/10.1016/S0021-9258\(19\)84762-2](https://doi.org/10.1016/S0021-9258(19)84762-2)
- 481 González, A., & Hall, M. N. (2017). Nutrient sensing and TOR signaling in yeast and mammals. *The*  
482 *EMBO Journal*, 36(4), 397–408. <https://doi.org/10.15252/emboj.201696010>
- 483 Grant, S. G. N., Jessee, J., Bloom, F. R., & Hanahan, D. (1990). Differential plasmid rescue from  
484 transgenic mouse DNAs into *Escherichia coli* methylation-restriction mutants. *Proceedings of the*  
485 *National Academy of Sciences*, 87(12), 4645–4649. <https://doi.org/10.1073/pnas.87.12.4645>
- 486 Huber, A., Bodenmiller, B., Uotila, A., Stahl, M., Wanka, S., Gerrits, B., Aebersold, R., & Loewith,  
487 R. (2009). Characterization of the rapamycin-sensitive phosphoproteome reveals that Sch9 is a central  
488 coordinator of protein synthesis. *Genes & Development*, 23(16), 1929–1943.  
489 <https://doi.org/10.1101/gad.532109>
- 490 Hughes Hallett, J. E., Luo, X., & Capaldi, A. P. (2014). State Transitions in the TORC1 Signaling  
491 Pathway and Information Processing in *Saccharomyces cerevisiae*. *Genetics*, 198(2), 773–786.  
492 <https://doi.org/10.1534/genetics.114.168369>
- 493 Hughes Hallett, J. E., Luo, X., & Capaldi, A. P. (2015). Snf1/AMPK promotes the formation of  
494 Kog1/Raptor-bodies to increase the activation threshold of TORC1 in budding yeast. *ELife*,  
495 4(OCTOBER2015), 1–19. <https://doi.org/10.7554/eLife.09181>
- 496 Hwang, W. W., Venkatasubrahmanyam, S., Ianculescu, A. G., Tong, A., Boone, C., & Madhani, H.  
497 D. (2003). A conserved RING finger protein required for histone H2B monoubiquitination and cell  
498 size control. *Molecular Cell*, 11(1), 261–266. <http://www.ncbi.nlm.nih.gov/pubmed/12535538>

- 499 Just, I., Selzer, J., Wilm, M., von Eichel-Streiber, C., Mann, M., & Aktories, K. (1995). Glucosylation  
500 of Rho proteins by *Clostridium difficile* toxin B. *Nature*, *375*(6531), 500–503.  
501 <https://doi.org/10.1038/375500a0>
- 502 Kelley, L. A., Mezulis, S., Yates, C. M., Wass, M. N., & Sternberg, M. J. E. (2015). The Phyre2 web  
503 portal for protein modeling, prediction and analysis. *Nature Protocols*, *10*(6), 845–858.  
504 <https://doi.org/10.1038/nprot.2015-053>
- 505 Khalil, I. A., Troeger, C., Blacker, B. F., Rao, P. C., Brown, A., Atherly, D. E., Brewer, T. G.,  
506 Engmann, C. M., Houghton, E. R., Kang, G., Kotloff, K. L., Levine, M. M., Luby, S. P., MacLennan, C.  
507 A., Pan, W. K., Pavlinac, P. B., Platts-Mills, J. A., Qadri, F., Riddle, M. S., ... Reiner, R. C. (2018).  
508 Morbidity and mortality due to *Shigella* and enterotoxigenic *Escherichia coli* diarrhoea: the Global  
509 Burden of Disease Study 1990-2016. *The Lancet Infectious Diseases*, *18*(11), 1229–1240.  
510 [https://doi.org/10.1016/S1473-3099\(18\)30475-4](https://doi.org/10.1016/S1473-3099(18)30475-4)
- 511 Kim, A., & Cunningham, K. W. (2015). A LAPF/phafin1-like protein regulates TORC1 and  
512 lysosomal membrane permeabilization in response to endoplasmic reticulum membrane stress.  
513 *Molecular Biology of the Cell*, *26*(25), 4631–4645. <https://doi.org/10.1091/mbc.E15-08-0581>
- 514 Kim, J.-M., Seok, O.-H., Ju, S., Heo, J.-E., Yeom, J., Kim, D.-S., Yoo, J.-Y., Varshavsky, A., Lee, C.,  
515 & Hwang, C.-S. (2018). Formyl-methionine as an N-degron of a eukaryotic N-end rule pathway.  
516 *Science*, *362*(6418), eaat0174. <https://doi.org/10.1126/science.aat0174>
- 517 Kramer, R. W., Slagowski, N. L., Eze, N. A., Giddings, K. S., Morrison, M. F., Siggers, K. A.,  
518 Starnbach, M. N., & Lesser, C. F. (2007). Yeast functional genomic screens lead to identification of a  
519 role for a bacterial effector in innate immunity regulation. *PLoS Pathogens*, *3*(2), e21.  
520 <https://doi.org/10.1371/journal.ppat.0030021>
- 521 Kushnirov, V. V. (2000). Rapid and reliable protein extraction from yeast. *Yeast*, *16*(9), 857–860.  
522 [https://doi.org/10.1002/1097-0061\(20000630\)16:9<857::AID-YEA561>3.0.CO;2-B](https://doi.org/10.1002/1097-0061(20000630)16:9<857::AID-YEA561>3.0.CO;2-B)
- 523 Levinsohn, J. L., Newman, Z. L., Hellmich, K. A., Fattah, R., Getz, M. A., Liu, S., Sastalla, I.,  
524 Leppla, S. H., & Moayeri, M. (2012). Anthrax Lethal Factor Cleavage of Nlrp1 Is Required for  
525 Activation of the Inflammasome. *PLoS Pathogens*, *8*(3), e1002638.  
526 <https://doi.org/10.1371/journal.ppat.1002638>
- 527 Li, H., Xu, H., Zhou, Y., Zhang, J., Long, C., Li, S., Chen, S., Zhou, J. M., & Shao, F. (2007). The  
528 phosphothreonine lyase activity of a bacterial type III effector family. *Science*, *315*(5814), 1000–  
529 1003. <https://doi.org/10.1126/science.1138960>
- 530 Li, Z., Liu, W., Fu, J., Cheng, S., Xu, Y., Wang, Z., Liu, X., Shi, X., Liu, Y., Qi, X., Liu, X., Ding, J.,  
531 & Shao, F. (2021). *Shigella* evades pyroptosis by arginine ADP-ribosylation of caspase-11. *Nature*,  
532 *599*(7884), 290–295. <https://doi.org/10.1038/s41586-021-04020-1>
- 533 Liu, W., Zhou, Y., Peng, T., Zhou, P., Ding, X., Li, Z., Zhong, H., Xu, Y., Chen, S., Hang, H. C., &  
534 Shao, F. (2018). N<sup>ε</sup>-fatty acylation of multiple membrane-associated proteins by *Shigella* IcsB effector  
535 to modulate host function. *Nature Microbiology*, *3*(9), 996–1009. <https://doi.org/10.1038/s41564-018-0215-6>
- 537 Lu, R., Herrera, B. B., Eshleman, H. D., Fu, Y., Bloom, A., Li, Z., Sacks, D. B., & Goldberg, M. B.  
538 (2015). *Shigella* Effector OspB Activates mTORC1 in a Manner That Depends on IQGAP1 and  
539 Promotes Cell Proliferation. *PLoS Pathogens*, *11*(10), e1005200.  
540 <https://doi.org/10.1371/journal.ppat.1005200>

- 541 Lupardus, P. J., Shen, A., Bogyo, M., & Garcia, K. C. (2008). Small molecule-induced allosteric  
542 activation of the *Vibrio cholerae* RTX cysteine protease domain. *Science*, 322(5899), 265–268.  
543 <https://doi.org/10.1126/science.1162403>
- 544 Melnykov, A., Chen, S.-J., & Varshavsky, A. (2019). Gid10 as an alternative N-recognin of the  
545 Pro/N-degron pathway. *Proceedings of the National Academy of Sciences*, 116(32), 15914–15923.  
546 <https://doi.org/10.1073/pnas.1908304116>
- 547 Miao, Y., Tipakornsawapak, T., Zheng, L., Mu, Y., & Lewellyn, E. (2018). Phospho-regulation of  
548 intrinsically disordered proteins for actin assembly and endocytosis. *The FEBS Journal*, 285(15),  
549 2762–2784. <https://doi.org/10.1111/febs.14493>
- 550 Mittal, R., Peak-Chew, S. Y., Sade, R. S., Vallis, Y., & McMahon, H. T. (2010). The acetyltransferase  
551 activity of the bacterial toxin YopJ of *Yersinia* is activated by eukaryotic host cell inositol  
552 hexakisphosphate. *The Journal of Biological Chemistry*, 285(26), 19927–19934.  
553 <https://doi.org/10.1074/jbc.M110.126581>
- 554 Mulugu, S., Bai, W., Fridy, P. C., Bastidas, R. J., Otto, J. C., Dollins, D. E., Haystead, T. A., Ribeiro,  
555 A. A., & York, J. D. (2007). A conserved family of enzymes that phosphorylate inositol  
556 hexakisphosphate. *Science*, 316(5821), 106–109. <https://doi.org/10.1126/science.1139099>
- 557 Niebuhr, K., Giuriato, S., Pedron, T., Philpott, D. J., Gaits, F., Sable, J., Sheetz, M. P., Parsot, C.,  
558 Sansonetti, P. J., & Payraastre, B. (2002). Conversion of PtdIns(4,5)P<sub>2</sub> into PtdIns(5)P by the *S.*  
559 *flexneri* effector IpgD reorganizes host cell morphology. *The EMBO Journal*, 21(19), 5069–5078.  
560 <https://doi.org/10.1093/emboj/cdf522>
- 561 Oliveira, A. P., Ludwig, C., Zampieri, M., Weisser, H., Aebersold, R., & Sauer, U. (2015). Dynamic  
562 phosphoproteomics reveals TORC1-dependent regulation of yeast nucleotide and amino acid  
563 biosynthesis. *Science Signaling*, 8(374), rs4. <https://doi.org/10.1126/scisignal.2005768>
- 564 Prochazkova, K., & Satchell, K. J. F. (2008). Structure-function analysis of inositol  
565 hexakisphosphate-induced autoprocessing of the *Vibrio cholerae* multifunctional autoprocessing RTX  
566 toxin. *The Journal of Biological Chemistry*, 283(35), 23656–23664.  
567 <https://doi.org/10.1074/jbc.M803334200>
- 568 Pruitt, R. N., Chagot, B., Cover, M., Chazin, W. J., Spiller, B., & Lacy, D. B. (2009). Structure-  
569 function analysis of inositol hexakisphosphate-induced autoprocessing in *Clostridium difficile* toxin  
570 A. *The Journal of Biological Chemistry*, 284(33), 21934–21940.  
571 <https://doi.org/10.1074/jbc.M109.018929>
- 572 Reineke, J., Tenzer, S., Rupnik, M., Koschinski, A., Hasselmayer, O., Schratzenholz, A., Schild, H., &  
573 von Eichel-Streiber, C. (2007). Autocatalytic cleavage of *Clostridium difficile* toxin B. *Nature*,  
574 446(7134), 415–419. <https://doi.org/10.1038/nature05622>
- 575 Reinke, A., Anderson, S., McCaffery, J. M., Yates, J., Aronova, S., Chu, S., Fairclough, S., Iverson,  
576 C., Wedaman, K. P., & Powers, T. (2004). TOR complex 1 includes a novel component, Tco89p  
577 (YPL180w), and cooperates with Ssd1p to maintain cellular integrity in *Saccharomyces cerevisiae*.  
578 *The Journal of Biological Chemistry*, 279(15), 14752–14762.  
579 <https://doi.org/10.1074/jbc.M313062200>
- 580 Reinke, A., Chen, J. C.-Y., Aronova, S., & Powers, T. (2006). Caffeine targets TOR complex I and  
581 provides evidence for a regulatory link between the FRB and kinase domains of Tor1p. *The Journal of*  
582 *Biological Chemistry*, 281(42), 31616–31626. <https://doi.org/10.1074/jbc.M603107200>

- 583 Richter-Ruoff, B., Heinemeyer, W., & Wolf, D. H. (1992). The proteasome/multicatalytic-  
584 multifunctional proteinase. *In vivo* function in the ubiquitin-dependent N-end rule pathway of protein  
585 degradation in eukaryotes. *FEBS Letters*, *302*(2), 192–196. [https://doi.org/10.1016/0014-](https://doi.org/10.1016/0014-5793(92)80438-M)  
586 [5793\(92\)80438-M](https://doi.org/10.1016/0014-5793(92)80438-M)
- 587 Robinson, K. S., Teo, D. E. T., Tan, K. Sen, Toh, G. A., Ong, H. H., Lim, C. K., Lay, K., Au, B. V.,  
588 Lew, T. S., Chu, J. J. H., Chow, V. T. K., Wang, D. Y., Zhong, F. L., & Reversade, B. (2020).  
589 Enteroviral 3C protease activates the human NLRP1 inflammasome in airway epithelia. *Science*,  
590 *370*(6521), eaay2002. <https://doi.org/10.1126/science.aay2002>
- 591 Rohde, J. R., Breitkreutz, A., Chenal, A., Sansonetti, P. J., & Parsot, C. (2007). Type III secretion  
592 effectors of the IpaH family are E3 ubiquitin ligases. *Cell Host and Microbe*, *1*(1), 77–83.  
593 <https://doi.org/10.1016/j.chom.2007.02.002>
- 594 Saiardi, A., Sciambi, C., McCaffery, J. M., Wendland, B., & Snyder, S. H. (2002). Inositol  
595 pyrophosphates regulate endocytic trafficking. *Proceedings of the National Academy of Sciences*,  
596 *99*(22), 14206–14211. <https://doi.org/10.1073/pnas.212527899>
- 597 Sandstrom, A., Mitchell, P. S., Goers, L., Mu, E. W., Lesser, C. F., & Vance, R. E. (2019). Functional  
598 degradation: A mechanism of NLRP1 inflammasome activation by diverse pathogen enzymes.  
599 *Science*, *364*(6435), 1–13. <https://doi.org/10.1126/science.aau1330>
- 600 Savidge, T. C., Urvil, P., Oezguen, N., Ali, K., Choudhury, A., Acharya, V., Pinchuk, I., Torres, A.  
601 G., English, R. D., Wiktorowicz, J. E., Loeffelholz, M., Kumar, R., Shi, L., Nie, W., Braun, W.,  
602 Herman, B., Hausladen, A., Feng, H., Stamler, J. S., & Pothoulakis, C. (2011). Host S-nitrosylation  
603 inhibits clostridial small molecule-activated glucosylating toxins. *Nature Medicine*, *17*(9), 1136–1141.  
604 <https://doi.org/10.1038/nm.2405>
- 605 Sheahan, K., Cordero, C. L., & Satchell, K. J. F. (2007). Autoprocessing of the *Vibrio cholerae* RTX  
606 toxin by the cysteine protease domain. *The EMBO Journal*, *26*(10), 2552–2561.  
607 <https://doi.org/10.1038/sj.emboj.7601700>
- 608 Shen, A., Lupardus, P. J., Albrow, V. E., Guzzetta, A., Powers, J. C., Garcia, K. C., & Bogoy, M.  
609 (2009). Mechanistic and structural insights into the proteolytic activation of *Vibrio cholerae* MARTX  
610 toxin. *Nature Chemical Biology*, *5*(7), 469–478. <https://doi.org/10.1038/nchembio.178>
- 611 Slagowski, N. L., Kramer, R. W., Morrison, M. F., LaBaer, J., & Lesser, C. F. (2008). A Functional  
612 Genomic Yeast Screen to Identify Pathogenic Bacterial Proteins. *PLoS Pathogens*, *4*(1).  
613 <https://doi.org/10.1371/journal.ppat.0040009>
- 614 Sopko, R., Huang, D., Preston, N., Chua, G., Papp, B., Kafadar, K., Snyder, M., Oliver, S. G., Cyert,  
615 M., Hughes, T. R., Boone, C., & Andrews, B. (2006). Mapping pathways and phenotypes by  
616 systematic gene overexpression. *Molecular Cell*, *21*(3), 319–330.  
617 <https://doi.org/10.1016/j.molcel.2005.12.011>
- 618 Sreelatha, A., Nolan, C., Park, B. C., Pawłowski, K., Tomchick, D. R., & Tagliabracci, V. S. (2020).  
619 A *Legionella* effector kinase is activated by host inositol hexakisphosphate. *The Journal of Biological*  
620 *Chemistry*, *1*, jbc.RA120.013067. <https://doi.org/10.1074/jbc.RA120.013067>
- 621 Sullivan, A., Wallace, R. L., Wellington, R., Luo, X., & Capaldi, A. P. (2019). Multilayered  
622 regulation of TORC1-body formation in budding yeast. *Molecular Biology of the Cell*, *30*(3), 400–  
623 410. <https://doi.org/10.1091/mbc.E18-05-0297>

- 624 Tanigawa, M., Yamamoto, K., Nagatoishi, S., Nagata, K., Noshiro, D., Noda, N. N., Tsumoto, K., &  
625 Maeda, T. (2021). A glutamine sensor that directly activates TORC1. *Communications Biology*, 4(1),  
626 1093. <https://doi.org/10.1038/s42003-021-02625-w>
- 627 Tsu, B. V., Beierschmitt, C., Ryan, A. P., Agarwal, R., Mitchell, P. S., & Daugherty, M. D. (2021).  
628 Diverse viral proteases activate the NLRP1 inflammasome. *ELife*, 10(9), 1689–1699.  
629 <https://doi.org/10.7554/eLife.60609>
- 630 Tyson, G. H., & Hauser, A. R. (2013). Phosphatidylinositol 4,5-Bisphosphate Is a Novel Coactivator  
631 of the *Pseudomonas aeruginosa* Cytotoxin ExoU. *Infection and Immunity*, 81(8), 2873–2881.  
632 <https://doi.org/10.1128/IAI.00414-13>
- 633 Ukai, H., Araki, Y., Kira, S., Oikawa, Y., May, A. I., & Noda, T. (2018). Gtr/Ego-independent  
634 TORC1 activation is achieved through a glutamine-sensitive interaction with Pib2 on the vacuolar  
635 membrane. *PLoS Genetics*, 14(4), e1007334. <https://doi.org/10.1371/journal.pgen.1007334>
- 636 Varshavsky, A. (2019). N-degron and C-degron pathways of protein degradation. *Proceedings of the*  
637 *National Academy of Sciences of the United States of America*, 116(2), 358–366.  
638 <https://doi.org/10.1073/pnas.1816596116>
- 639 Wickliffe, K. E., Leppla, S. H., & Moayeri, M. (2008). Killing of macrophages by anthrax lethal  
640 toxin: involvement of the N-end rule pathway. *Cellular Microbiology*, 10(6), 1352–1362.  
641 <https://doi.org/10.1111/j.1462-5822.2008.01131.x>
- 642 Wood, A., Krogan, N. J., Dover, J., Schneider, J., Heidt, J., Boateng, M. A., Dean, K., Golshani, A.,  
643 Zhang, Y., Greenblatt, J. F., Johnston, M., & Shilatifard, A. (2003). Bre1, an E3 ubiquitin ligase  
644 required for recruitment and substrate selection of Rad6 at a promoter. *Molecular Cell*, 11(1), 267–  
645 274. <http://www.ncbi.nlm.nih.gov/pubmed/12535539>
- 646 Xu, H., Shi, J., Gao, H., Liu, Y., Yang, Z., Shao, F., & Dong, N. (2019). The N-end rule ubiquitin  
647 ligase UBR2 mediates NLRP1B inflammasome activation by anthrax lethal toxin. *The EMBO*  
648 *Journal*, 38(13), 1–11. <https://doi.org/10.15252/embj.2019101996>
- 649 Yuan, W., Guo, S., Gao, J., Zhong, M., Yan, G., Wu, W., Chao, Y., & Jiang, Y. (2017). General  
650 Control Nonderepressible 2 (GCN2) Kinase Inhibits Target of Rapamycin Complex 1 in Response to  
651 Amino Acid Starvation in *Saccharomyces cerevisiae*. *Journal of Biological Chemistry*, 292(7), 2660–  
652 2669. <https://doi.org/10.1074/jbc.M116.772194>
- 653 Zhang, L., Ding, X., Cui, J., Xu, H., Chen, J., Gong, Y.-N., Hu, L., Zhou, Y., Ge, J., Lu, Q., Liu, L.,  
654 Chen, S., & Shao, F. (2012). Cysteine methylation disrupts ubiquitin-chain sensing in NF- $\kappa$ B  
655 activation. *Nature*, 481(7380), 204–208. <https://doi.org/10.1038/nature10690>
- 656 Zurawski, D. V., Mumy, K. L., Faherty, C. S., McCormick, B. A., & Maurelli, A. T. (2009). *Shigella*  
657 *flexneri* type III secretion system effectors OspB and OspF target the nucleus to downregulate the host  
658 inflammatory response via interactions with retinoblastoma protein. *Molecular Microbiology*, 71(2),  
659 350–368. <https://doi.org/10.1111/j.1365-2958.2008.06524.x>
- 660

661 **Figures**

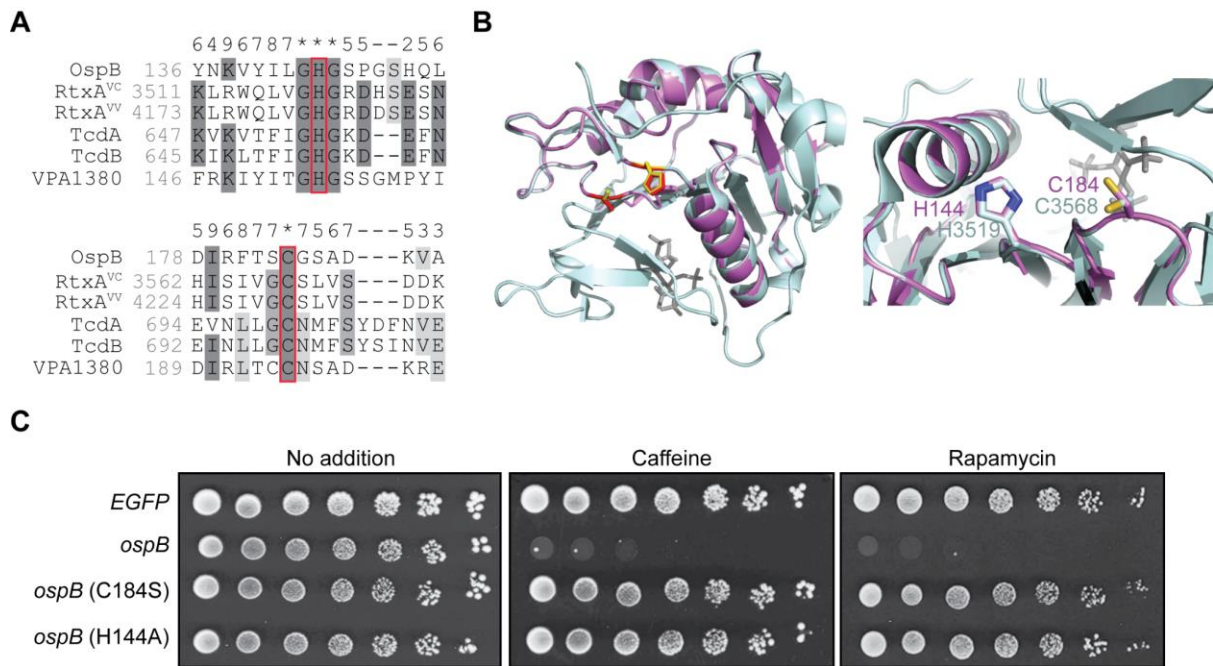

662

663 **FIGURE 1: OspB possesses a predicted cysteine protease catalytic dyad.**

664 (A) Multiple sequence alignment of OspB with the catalytic residues of the cysteine protease  
 665 domains of RtxA from *V. cholerae* (RtxA<sup>VC</sup>) and *V. vulnificus* (RtxA<sup>VV</sup>), *C. difficile* TcdA and  
 666 TcdB, and the OspB ortholog VPA1380 from *V. parahaemolyticus*. Red boxes indicate  
 667 catalytic residues of the cysteine protease domains and the aligned putative catalytic residues  
 668 of OspB. Darkness of gray shading reflects the conservation of individual residues, and the  
 669 numbers above the alignment score the conservation at each position. Asterisks denote full  
 670 conservation among the aligned sequences.

671 (B) Cartoon depiction of a tertiary structure model of OspB (violet) on the CPD of RtxA<sup>VC</sup> (left  
 672 panel; PDB: 3EEB) (pale cyan). In the left panel, the catalytic residues of the cysteine protease  
 673 domain are denoted by yellow sticks, with the putative catalytic residues of OspB shown as red  
 674 sticks. The inositol hexakisphosphate cofactor in the RtxA<sup>VC</sup> cysteine protease domain structure  
 675 is shown in dark gray. In the right panel, an enlarged and rotated view shows the active site,  
 676 highlighting the superposition of the putative OspB catalytic residues with those of the cysteine  
 677 protease domain, labelled according to the color of the cartoon.

678 (C) Growth of yeast strains expressing *ospB* constructs or an *EGFP* control. Serial dilutions were  
679 spotted on media either without additives or supplemented with the TORC1 inhibitors caffeine  
680 or rapamycin ( $n = 3$ ).



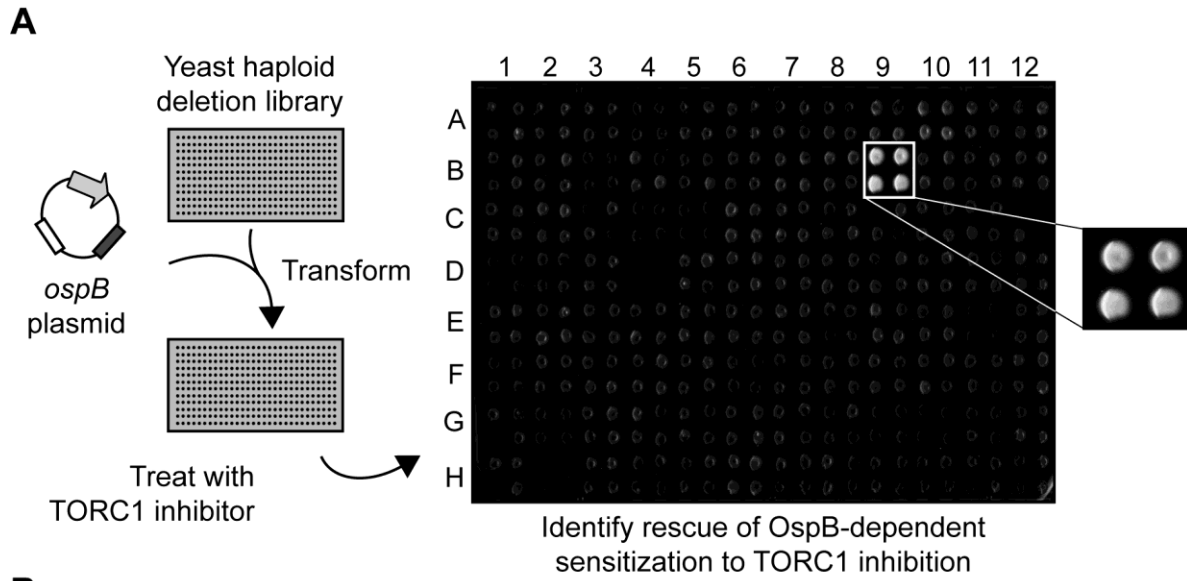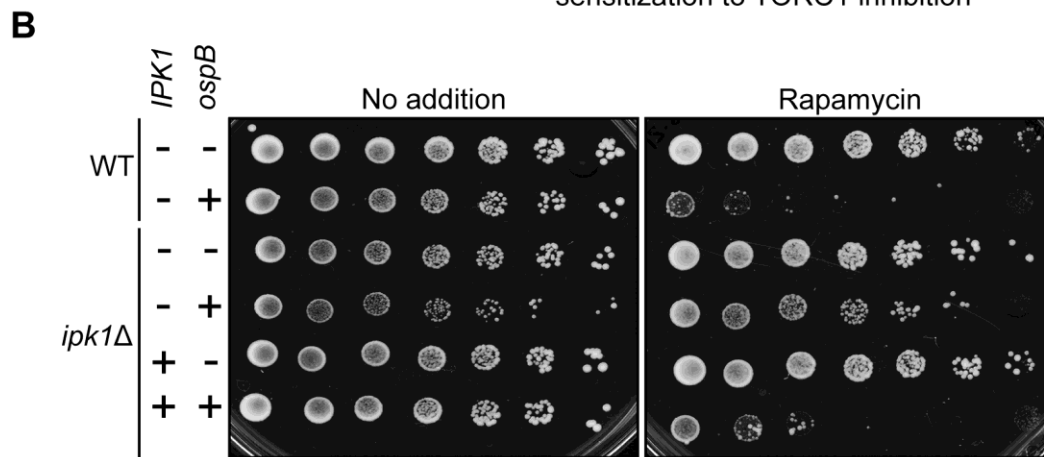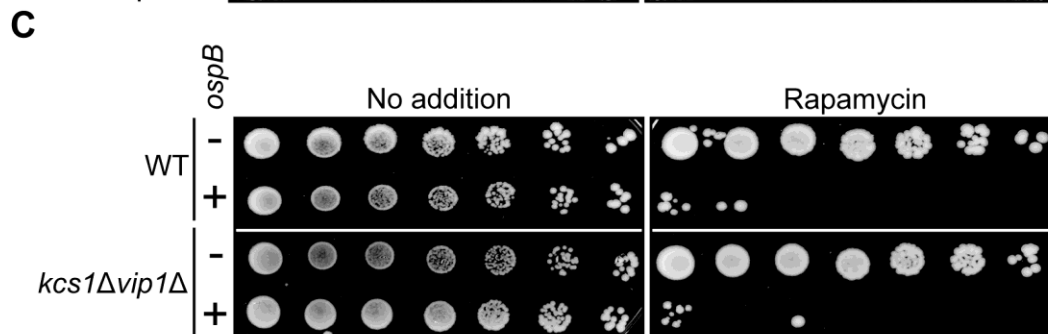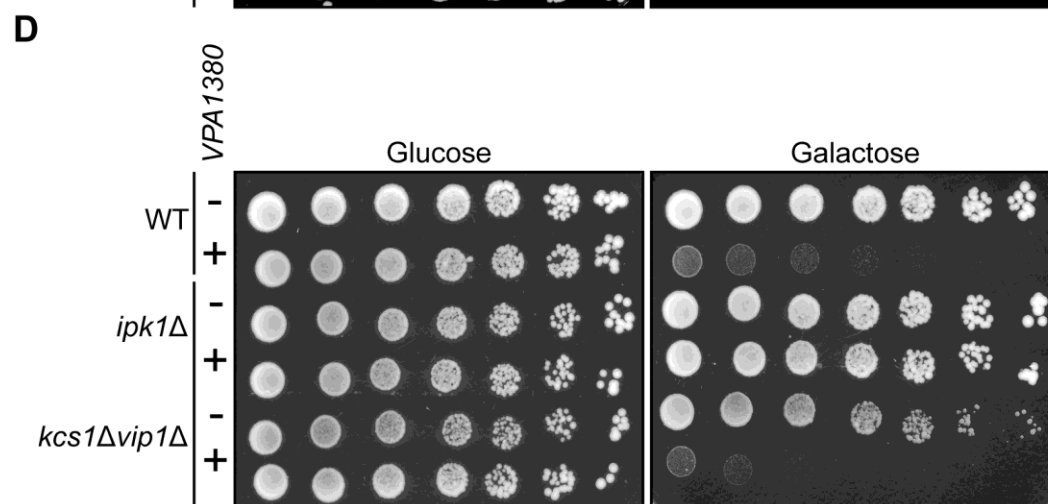

682 **FIGURE 2: Inhibition of yeast growth by OspB-family effectors requires inositol**  
683 **hexakisphosphate.**

684 (A) Schematic of the deletion library screen designed to identify yeast host factors required for  
685 OspB-mediated growth inhibition in the presence of caffeine. An example of a quadruplicate-  
686 spotted output plate is shown, with one hit magnified.

687 (B) Growth of yeast strains expressing *ospB* constructs or vector control in the presence or absence  
688 of *IPK1*. Serial dilutions were spotted on media with or without rapamycin.

689 (C) Growth of yeast strains expressing *ospB* constructs or vector control in the presence or absence  
690 of both genes encoding the IP<sub>6</sub> kinases Kcs1p and Vip1p. Serial dilutions were spotted on media  
691 with or without rapamycin.

692 (D) Growth of yeast strains expressing *VPA1380* or vector control in the WT, *ipk1Δ*, and  
693 *kcs1Δvip1Δ* backgrounds. Serial dilutions were spotted on media repressing (glucose) or  
694 inducing (galactose) *VPA1380* construct expression.

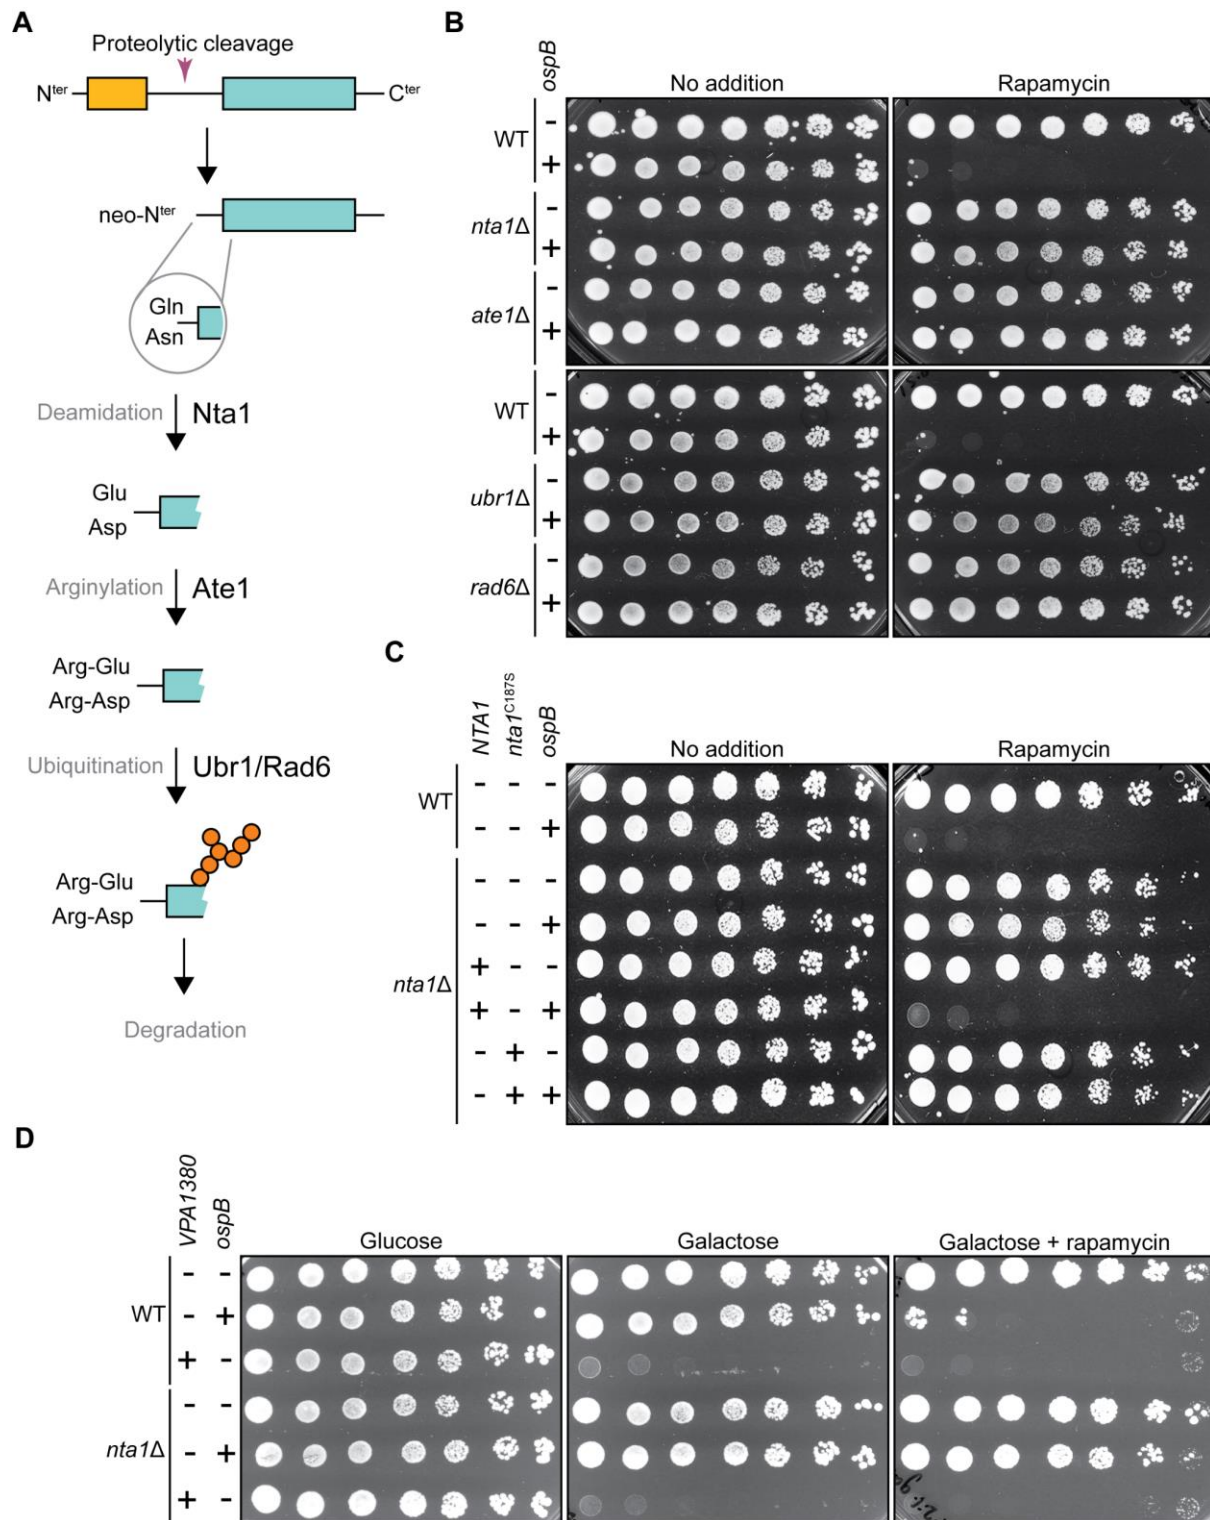

695

696 **FIGURE 3: The arginine N-degron pathway is required for growth inhibition by OspB.**

697

(A) Schematic of the arginine N-degron pathway.

698 (B) Growth of yeast strains expressing *ospB* or vector control in the presence or absence of genes  
699 encoding components of the arginine N-degron pathway. Serial dilutions were spotted on media  
700 with or without rapamycin ( $n = 3$ ).

701 (C) Growth of yeast strains expressing *ospB* or vector control in the presence or absence of a  
702 functional *NTAI* allele. Serial dilutions were spotted on media with or without rapamycin ( $n =$   
703 3).

704 (D) Growth of yeast strains expressing *ospB*, *VPA1380*, or vector control in the presence or absence  
705 of *NTAI*. Serial dilutions were spotted on media with or without rapamycin, in conditions  
706 repressing (glucose) or inducing (galactose) *VPA1380* expression ( $n = 3$ ).

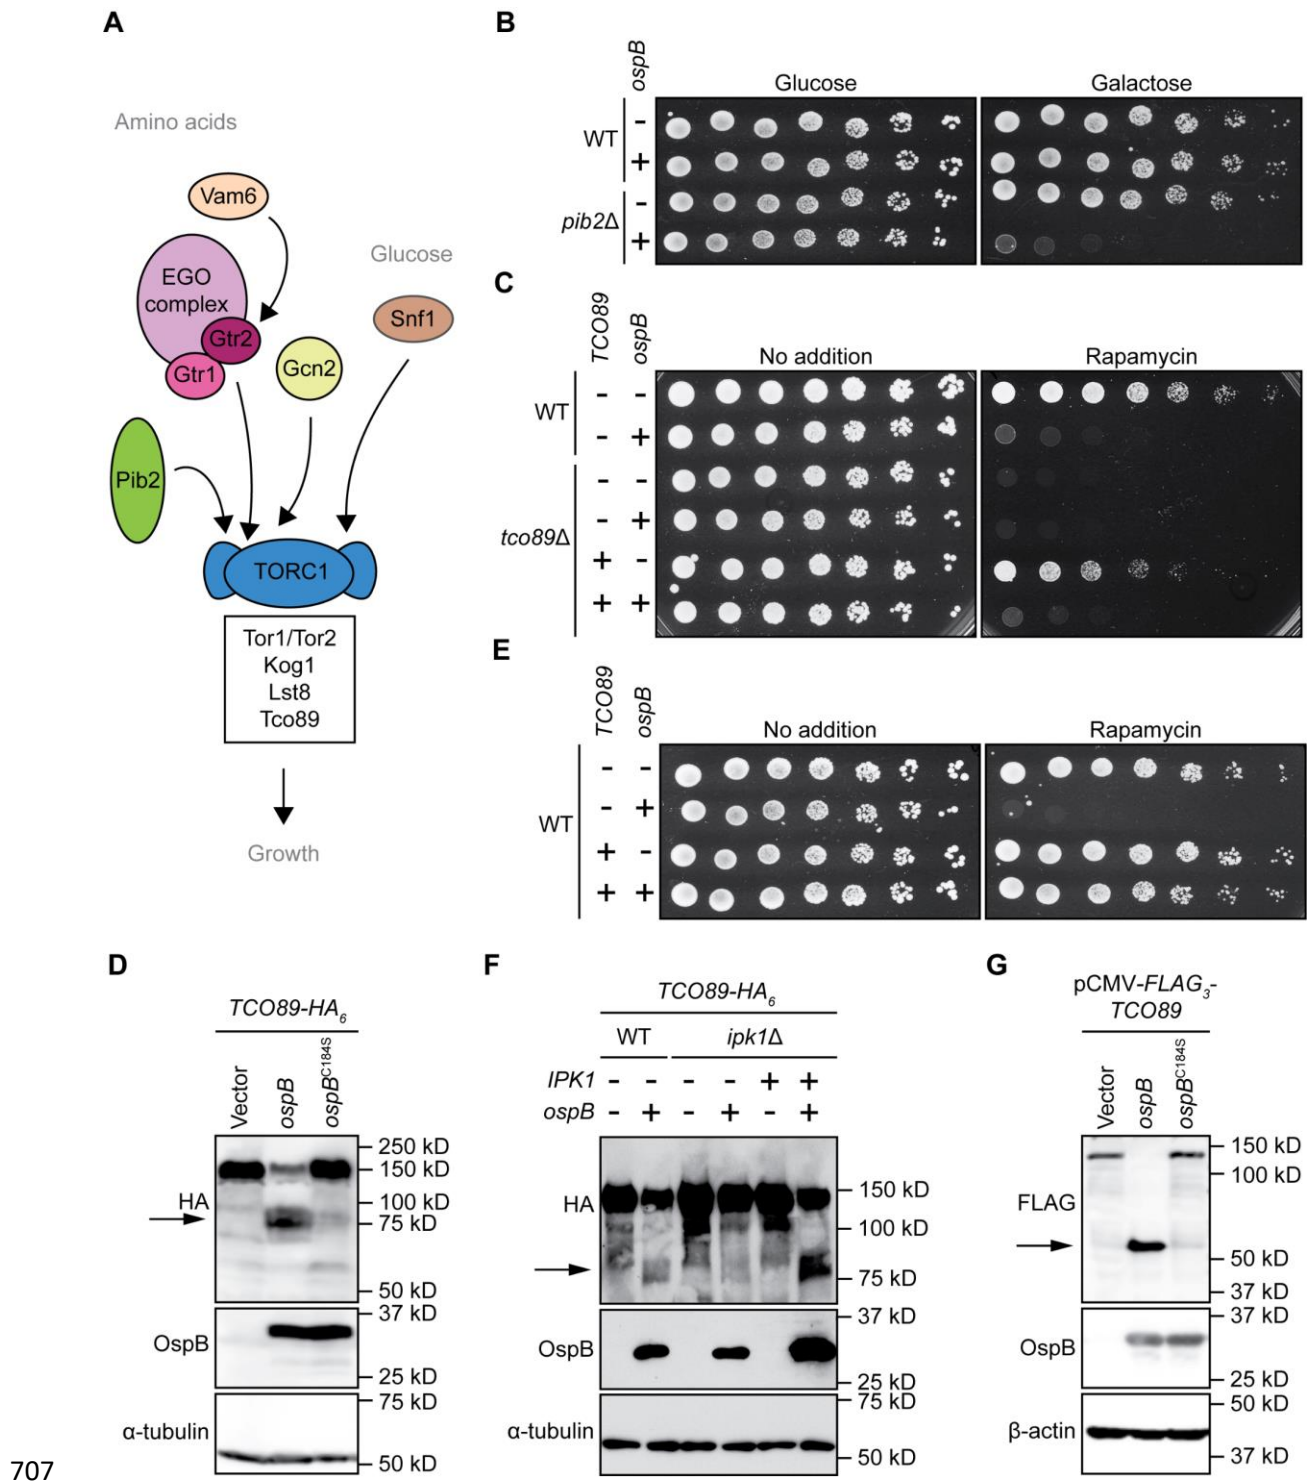

707  
708 **FIGURE 4: The TORC1 subunit Tco89p is cleaved by OspB.**

709 (A) Diagram of the yeast TORC1 signaling network.

710 (B) Growth of yeast strains expressing *ospB* or vector control in the presence or absence of *PIB2*.

711 Serial dilutions were spotted on media containing glucose (repressing *ospB* expression) or

712 galactose (inducing *ospB* expression) ( $n = 3$ ).

- 713 (C) Growth of yeast strains expressing *ospB* or vector control in the presence or absence of *tco89*.  
714 Serial dilutions were spotted on media with or without rapamycin ( $n = 4$ ).
- 715 (D) Western blot assessing cleavage of Tco89p in yeast, in the presence of OspB, OspB(C184S) or  
716 vector control. Alpha tubulin is the loading control. The arrow marks the Tco89p C-terminal  
717 cleavage product ( $n = 4$ ).
- 718 (E) Growth of wild type yeast expressing *ospB* or vector control, in the presence or absence of  
719 *TCO89* expression from a multi-copy plasmid. Serial dilutions were spotted on media with or  
720 without rapamycin ( $n = 3$ ).
- 721 (F) Western blot assessing cleavage of Tco89p by OspB in wild type or *ipk1* mutant yeast. Alpha  
722 tubulin is the loading control. The arrow marks the Tco89p C-terminal cleavage product ( $n =$   
723 3).
- 724 (G) Western blot assessing cleavage of a Tco89p construct expressed in HEK293T cells, in the  
725 presence of OspB, OspB(C184S) or vector control. Beta-actin is the loading control. The arrow  
726 marks the Tco89p N-terminal cleavage product ( $n = 3$ ).

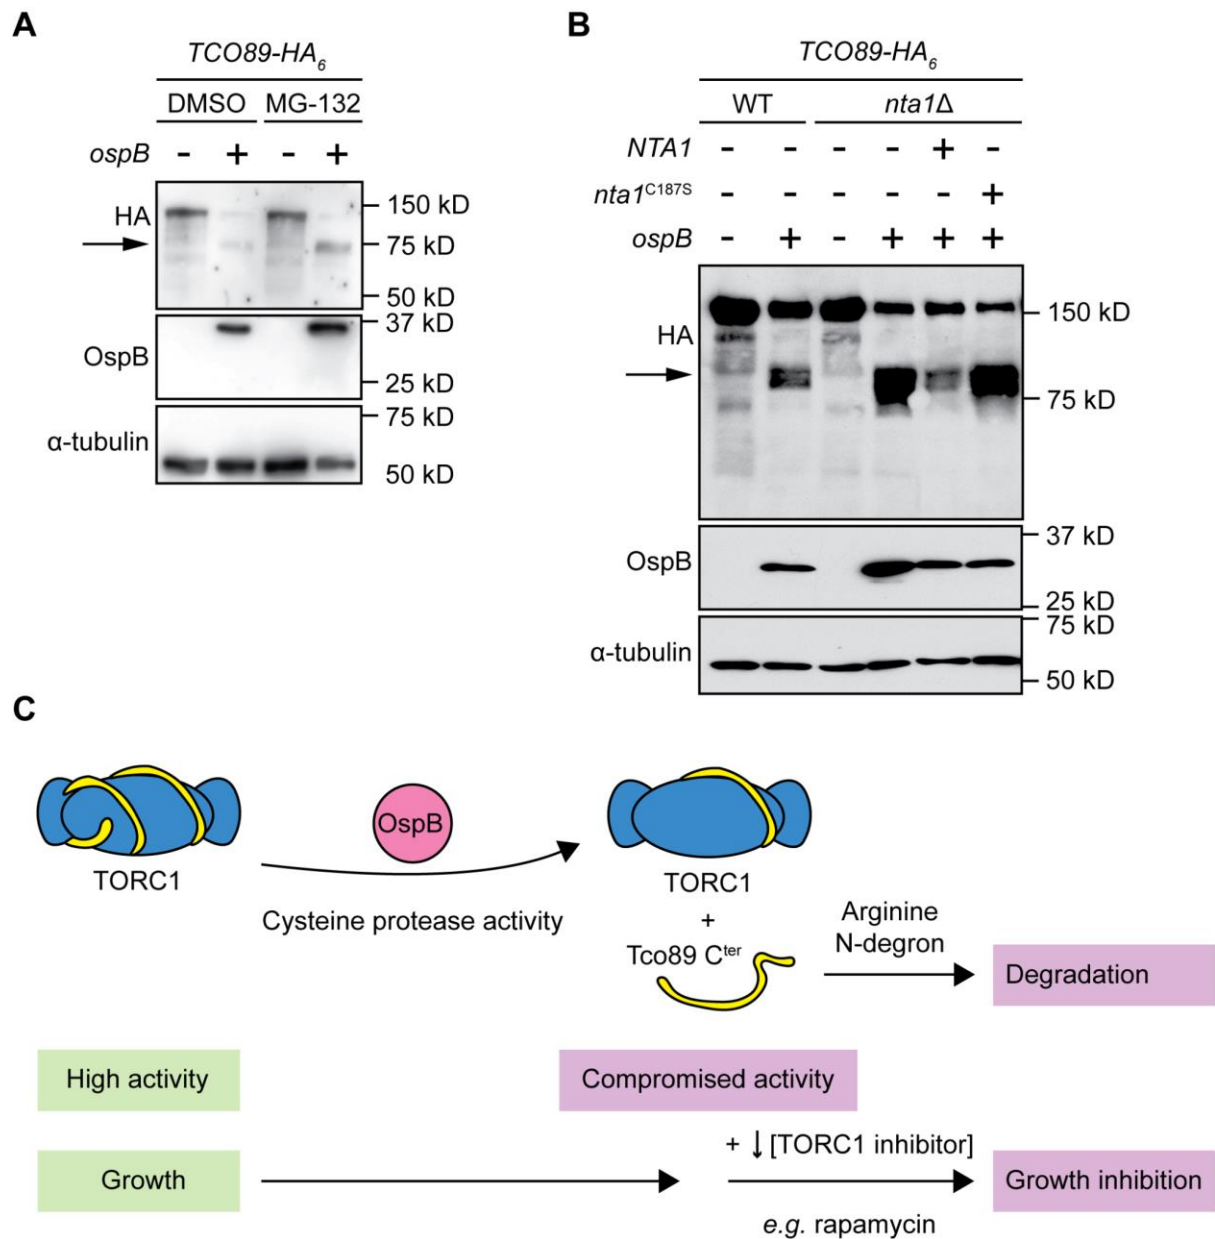

727

728 **FIGURE 5: Degradation of the Tco89p C-terminal fragment by the arginine N-degron pathway.**

729 (A) Western blot assessing cleavage of Tco89p by OspB in the presence and absence of proteasome  
730 inhibitor MG-132. Alpha tubulin acts as a loading control. The arrow marks the Tco89p C-  
731 terminal cleavage product ( $n = 3$ ).

732 (B) Western blot assessing cleavage of Tco89p by OspB in the presence or absence of a functional  
733 *NTA1* allele. Alpha tubulin is the loading control. The arrow marks the Tco89p C-terminal  
734 cleavage product ( $n = 3$ ).

735 (C) Model of the mechanism of OspB-mediated sensitization of yeast to TORC1 inhibition.
